# Supplementary material for: Spatial Climate Patterns Explain Negligible Variation in Strength of Compensatory Density Feedbacks in Birds and Mammals
Source: PLoS One. 2014 Mar 11;9(3):e91536. doi: 10.1371/journal.pone.0091536 (PMC3950218; doi:10.1371/journal.pone.0091536)
Supplement: File S2 — Supporting Dataset. (XLS) [file pone.0091536.s002.xls]

## Sheet: Hoja3
Rótulos de fila	Cuenta de Study area
Aasla Island	1	1
Aigüestortes & Estany de Sant Maurici National Park, Lleida	1	2
Akutan (Cape Morgan), Alaska	1	3
Algonquin Provincial Park, Ontario	3	4
Alsace	1	5
Ammarnas, Vasterbotten	5	6
Applachian Plateau, Pennsylvania	1	7
Aragón	1	8
Argyll and Bute, Scotland	1	9
Beja, Faro & Setúbal Districts	1	10
Bialowieza Primeval Forest, Bialystok	12	11
Bird Island, South Georgia, Southern Ocean	2	12
Blue Cow, Snowy Mountains, New South Wales	1	13
Boundary Waters Canoe Area, Minnesota	1	14
Canigou Massif, Pyrenees	1	15
Central Mountain Massif, Madeira Island	1	16
Chatham, Massachusetts	1	17
Chillingham, Northumberland, England	1	18
Coastal population, California	1	19
Columbia River, British Columbia	1	20
Corsica	1	21
Cousin Island, Indian Ocean	1	22
Crete	1	23
Delta population, Wood Buffalo National Park	1	24
Doñana National Park, Huelva	2	25
Dornod Aimag	4	26
Eastern Westphalia	2	27
Eastern Wood, Bookham Common, Surrey, England	3	28
Ebro River Delta	1	29
Engure Marsh	1	30
Etelä-Suomen Laani, Karelia	1	31
Fangassier Lagoon, Camargue	1	32
Farne Islands, Northumberland, UK	1	33
Forest of Dean, Gloucestershire, England	1	34
Gatchina, Leningradskaya Oblast	1	35
George reserve, Ann Arbor, Michigan	1	36
Hexton, Hertfordshire	2	37
Highnam, Gloucestershire, England	1	38
Horsens Fjord, Vorsø	1	39
Isle of Rum, Scotland	1	40
Isle Royale, Michigan	2	41
Itasca State Park, Minnesota	2	42
Kielder Forest, England	1	43
Kilda Archipelago, Scotland	1	44
King Creek, Washingon	1	45
Kluane Lake, Yukon, Alaska	1	46
Kraghede	1	47
Kruger National Park	5	48
Labrador	1	49
Lahti	1	50
Laikipia, Samburu, Isiolo & Baringo Discricts	1	51
Lake Myvatn	1	52
Lake Tjulträsk	1	53
Lancelin Island, Western Australia	1	54
Langedoc Wetlands,	1	55
Laus Holmar Islands	1	56
Lezno	1	57
Marche, Apennines	1	58
Marion Island, Prince Edward Archipelago, Indian Ocean	1	59
Myvatn Lake	1	60
Nasen Lake	1	61
National Petroleum Reserve	1	62
Nelchina, Alaska	1	63
New Forest, Hampshire	2	64
New Hampshire	1	65
Ngorongoro Crater	1	66
Norrbotten	1	67
Northern Hudson Bay	1	68
Ottenby, Oland Island, Baltic Sea	1	69
Palomarin Study Area, Point Reyes National Reserve, California	1	70
Panoche Management Area, Diablo Range, California	1	71
Parinacota Province, Tarapaca	1	72
Pechoro-Ilych Reserve, Komi Republic	1	73
Picnic colony, East River Valley, Rocky Mountains, Colorado	1	74
Plateau Aigre	1	75
Point Reyes National Seashore, California	1	76
Porton Down, Wiltshire	1	77
Possession Island, Crozet Archipelago, Southern Ocean	1	78
Reserva Nacional Las Chinchillas	2	79
Rio Grande Valley, New Mexico	1	80
River Lygna	1	81
River Tyne, England	1	82
Robert Allerton Park, Illinois	3	83
Rocherort, Deux-Sèvres	1	84
Rolling Red Praries, Kansas	1	85
Rooipoort, Kimberley, Northern Cape Province	1	86
Serengeti	2	87
Sierras de Burete, Lavia & Cambrón, Murcia	1	88
Sikhote-Alin State Biosphere Zapodevnik, Primorski Krai	1	89
Skokholm Island, Pembrokeshire, Wales	5	90
Snake Summit (SK 0891) and Mill Hill, Peak District, England	1	91
Solothurn	1	92
St Lawrence Estuary	1	93
Sumburgh Head, Shetland Islands	1	94
Taimyr Peninsula, Siberia	1	95
Tdams grid, San Clemente Island, California	1	96
Thames River	1	97
Thetford Forest, Breckland, England	1	98
Thetford Forest, Norfolk/Sufolk	1	99
Upland population, Charlotte Valley, Delaware County, New York	1	100
Västerfärnebo	1	101
Villafáfila Wildelife Reserve, Zamora	1	102
Western Iceland	1	103
Western Scotland	1	104
William Trelease Woods, Illinois	6	105
Winema National Forest, Oregon	1	106
Wytham Wood, Oxfordshire, England	5	107
Yellowstone National Park, Wyoming	2	108
Total general	159	109

## Sheet: PCA
	lat	long	red	hq	dds			q	bs	mT	mP	sT	sP	maxT	maxP	minT	minP
1	62	-57	0	1	-0.53	Pechoro-Ilych Reserve, Komi Republic	Russia	30	375	-0.9	675	1190.5	29	22.6	83	-22.7	30
16	51.78	1.34	1	1	-1.076	Wytham Wood, Oxfordshire, England	UK	30	212	9.8	637	465.9	13	21.1	63	0.5	39
17	51.78	1.34	1	1	-0.973	Wytham Wood, Oxfordshire, England	UK	30	133	9.8	637	465.9	13	21.1	63	0.5	39
19	51.7	5.15	2	1	-0.282	Skokholm Island, Pembrokeshire, Wales	UK	52	440	9.9	868	433.6	25	19.4	101	2.2	50
20	51.7	5.15	2	1	-0.418	Skokholm Island, Pembrokeshire, Wales	UK	52	145	9.9	868	433.6	25	19.4	101	2.2	50
21	51.7	5.15	2	0	-0.148	Skokholm Island, Pembrokeshire, Wales	UK	52	150	9.9	868	433.6	25	19.4	101	2.2	50
26	51.7	5.15	2	1	-0.495	Skokholm Island, Pembrokeshire, Wales	UK	52	435	9.9	868	433.6	25	19.4	101	2.2	50
27	51.7	5.15	2	0	-0.153	Skokholm Island, Pembrokeshire, Wales	UK	52	140	9.9	868	433.6	25	19.4	101	2.2	50
68	40.033	88.3	3	0	-0.298	William Trelease Woods, Illinois	USA	50	120	11	975	984.3	23	30.2	112	-8.7	48
71	40.033	88.3	3	0	-0.296	William Trelease Woods, Illinois	USA	43	220	11	975	984.3	23	30.2	112	-8.7	48
73	40.033	88.3	3	0	-0.412	William Trelease Woods, Illinois	USA	50	140	11	975	984.3	23	30.2	112	-8.7	48
76	40.033	88.3	3	0	-0.494	William Trelease Woods, Illinois	USA	53	240	11	975	984.3	23	30.2	112	-8.7	48
88	39.983	88.65	3	1	-0.554	Robert Allerton Park, Illinois	USA	26	190	11.1	986	984.5	24	30.4	109	-8.9	47
90	39.983	88.65	3	1	-0.615	Robert Allerton Park, Illinois	USA	26	190	11.1	986	984.5	24	30.4	109	-8.9	47
91	39.983	88.65	3	1	-0.808	Robert Allerton Park, Illinois	USA	24	140	11.1	986	984.5	24	30.4	109	-8.9	47
92	40.033	88.3	3	1	-0.488	William Trelease Woods, Illinois	USA	50	220	11	975	984.3	23	30.2	112	-8.7	48
94	40.033	88.3	3	0	-0.305	William Trelease Woods, Illinois	USA	50	150	11	975	984.3	23	30.2	112	-8.7	48
102	51.25	0.33	4	1	-0.984	Eastern Wood, Bookham Common, Surrey, England	UK	27	125	9.9	670	487.7	13	22.2	66	0.4	42
106	51.25	0.33	4	1	-0.309	Eastern Wood, Bookham Common, Surrey, England	UK	30	150	9.9	670	487.7	13	22.2	66	0.4	42
107	51.25	0.33	4	1	-0.94	Eastern Wood, Bookham Common, Surrey, England	UK	27	140	9.9	670	487.7	13	22.2	66	0.4	42
123	48.5	-7.5	0	0	-0.024	Alsace	France	42	1010	9.8	653	635.3	25	24.3	78	-1.7	37
195	51.83	2.33	0	1	-0.57	Highnam, Gloucestershire, England	UK	33	100	9.9	693	447.2	14	20.9	71	1.3	45
229	36.66	120.83	0	1	-0.666	Panoche Management Area, Diablo Range, California	USA	23	250	14.5	346	611.8	83	35.4	63	-0.2	1
526	51.78	1.34	1	1	-0.378	Wytham Wood, Oxfordshire, England	UK	37	115	9.7	667	485.4	13	21.4	66	0.2	41
568	65.96	-16.16	6	1	-0.505	Ammarnas, Vasterbotten	Sweden	20	210	0	751	759.8	25	15.5	94	-14	37
569	65.96	-16.16	6	1	-0.626	Ammarnas, Vasterbotten	Sweden	20	205	0	751	759.8	25	15.5	94	-14	37
570	65.96	-16.16	6	1	-1.047	Ammarnas, Vasterbotten	Sweden	20	150	0	751	759.8	25	15.5	94	-14	37
573	65.96	-16.16	6	1	-0.844	Ammarnas, Vasterbotten	Sweden	20	130	0	751	759.8	25	15.5	94	-14	37
576	65.96	-16.16	6	1	-1.106	Ammarnas, Vasterbotten	Sweden	20	120	0	751	759.8	25	15.5	94	-14	37
742	-3.166	-35.583	7	1	-0.09	Serengeti	Tanzania	26	2400	18.3	822	141	85	25.8	201	10.8	5
779	51.78	1.34	1	1	-0.645	Wytham Wood, Oxfordshire, England	UK	32	130	9.7	667	485.4	13	21.4	66	0.2	41
815	34.016	100.66	0	1	-0.756	Rolling Red Praries, Kansas	USA	28	160	16.3	544	834.4	51	35.4	83	-3.6	16
827	59.833	-30.0833	0	1	-1.11	Gatchina, Leningradskaya Oblast	Russia	25	610	4.8	646	895.5	31	22.2	80	-10.2	30
885	-28.75	-24.0833	0	1	-0.837	Rooipoort, Kimberley, Northern Cape Province	South Africa	86	280	18.6	380	543.1	72	34.2	75	1.2	6
916	51.916	0.333	0	1	-0.316	Hexton, Hertfordshire	UK	23	248	9.7	655	505.8	10	22	64	0	42
917	51.916	0.333	0	0	-0.89	Hexton, Hertfordshire	UK	23	235	9.7	655	505.8	10	22	64	0	42
925	47.16	95.25	8	0	-0.476	Itasca State Park, Minnesota	USA	21	200	3.3	669	1206	56	26.1	109	-22.1	14
927	47.16	95.25	8	1	-0.55	Itasca State Park, Minnesota	USA	21	240	3.3	669	1206	56	26.1	109	-22.1	14
928	47.216	-7.53	0	0	-0.202	Solothurn	Switzerland	106	265	8.2	1011	619.8	19	22.2	119	-2.9	65
939	60.75	-25.5	0	1	-0.707	Etelä-Suomen Laani, Karelia	Finland	40	500	4.2	646	845.5	30	21	81	-10.7	33
954	49.86	116.85	0	1	-0.409	Columbia River, British Columbia	Canada	21	890	6.3	771	762.3	32	25	106	-7.8	45
955	44.76	110.55	25	1	-0.452	Yellowstone National Park, Wyoming	USA	38	1687	-1.6	679	828.3	15	19.9	71	-19.1	42
958	51.033	1.33	9	1	-0.654	New Forest, Hampshire	UK	26	1715	10.2	778	466.9	21	21.7	86	1	47
959	51.033	1.33	9	1	-0.267	New Forest, Hampshire	UK	26	1277	10.2	778	466.9	21	21.7	86	1	47
962	52.5	-23.13	11	1	-0.637	Bialowieza Primeval Forest, Bialystok	Poland	20	210	7	563	809.6	34	23.3	77	-7.5	29
963	52.5	-23.13	11	1	-0.387	Bialowieza Primeval Forest, Bialystok	Poland	20	150	7	563	809.6	34	23.3	77	-7.5	29
964	52.5	-23.13	11	1	-0.999	Bialowieza Primeval Forest, Bialystok	Poland	20	125	7	563	809.6	34	23.3	77	-7.5	29
965	52.5	-23.13	11	1	-0.614	Bialowieza Primeval Forest, Bialystok	Poland	20	140	7	563	809.6	34	23.3	77	-7.5	29
966	52.5	-23.13	11	1	-0.625	Bialowieza Primeval Forest, Bialystok	Poland	20	115	7	563	809.6	34	23.3	77	-7.5	29
967	52.5	-23.13	11	1	-0.33	Bialowieza Primeval Forest, Bialystok	Poland	20	130	7	563	809.6	34	23.3	77	-7.5	29
968	52.5	-23.13	11	1	-0.553	Bialowieza Primeval Forest, Bialystok	Poland	20	90	7	563	809.6	34	23.3	77	-7.5	29
969	52.5	-23.13	11	1	-0.711	Bialowieza Primeval Forest, Bialystok	Poland	20	150	7	563	809.6	34	23.3	77	-7.5	29
971	48.13	-114.9	12	0	-0.167	Dornod Aimag	Mongolia	62	1285	1.3	165	1422.9	101	26.8	42	-25.1	2
972	48.13	-114.9	12	1	-0.193	Dornod Aimag	Mongolia	34	700	1.3	165	1422.9	101	26.8	42	-25.1	2
974	48.13	-114.9	12	1	-0.749	Dornod Aimag	Mongolia	26	450	1.3	165	1422.9	101	26.8	42	-25.1	2
975	48.13	-114.9	12	1	-0.649	Dornod Aimag	Mongolia	26	555	1.3	165	1422.9	101	26.8	42	-25.1	2
976	41.66	69.95	0	1	-0.741	Chatham, Massachusetts	USA	47	640	9.5	1122	745.1	12	23.7	113	-4.8	74
979	47.9	91.86	0	0	-0.014	Boundary Waters Canoe Area, Minnesota	USA	56	2800	3.2	712	1187.3	50	25.5	104	-21.4	18
981	64.983	19.083	0	1	-0.209	Western Iceland	Iceland	63	540	-0.2	1184	427.1	16	9.7	125	-7.7	73
982	52.5	-23.13	11	0	-0.03	Bialowieza Primeval Forest, Bialystok	Poland	118	2755	7	563	809.6	34	23.3	77	-7.5	29
983	52.5	-23.13	11	1	-0.074	Bialowieza Primeval Forest, Bialystok	Poland	48	2335	7	563	809.6	34	23.3	77	-7.5	29
984	52.5	-23.13	11	1	-0.222	Bialowieza Primeval Forest, Bialystok	Poland	48	1260	7	563	809.6	34	23.3	77	-7.5	29
985	52.5	-23.13	11	1	-0.179	Bialowieza Primeval Forest, Bialystok	Poland	48	1150	7	563	809.6	34	23.3	77	-7.5	29
1060	55.66	1.783	5	1	-0.527	Farne Islands, Northumberland, UK	UK	29	190	8.6	687	405.2	15	18.7	73	0.2	46
1080	-3.16	-35.583	7	1	-0.158	Serengeti	Tanzania	26	2010	18.3	822	141	85	25.8	201	10.8	5
1081	55.516	1.9	0	1	-0.103	Chillingham, Northumberland, England	UK	33	2700	8	747	413.5	15	18.2	77	-0.4	50
1082	53.893	62.25	0	1	-0.961	Labrador	Canada	92	1100	-4	958	1136.7	20	17.6	112	-26.2	60
1084	42.26	83.73	0	1	-0.381	George reserve, Ann Arbor, Michigan	USA	43	1625	8.8	819	959	19	28	86	-9.4	44
1087	-3.16	-35.55	0	1	-0.247	Ngorongoro Crater	Tanzania	30	2650	18.3	822	141	85	25.8	201	10.8	5
1088	49.45	123.55	0	1	-0.198	Northern Hudson Bay	Canada	113	870	6.9	1351	551.1	54	20.6	216	-3.3	40
1096	44.76	110.53	25	0	-0.051	Yellowstone National Park, Wyoming	USA	39	1938	-1.6	673	827.3	14	20	70	-19	42
1104	54.116	165.96	0	0	-1.041	Akutan (Cape Morgan), Alaska	USA	46	2600	2.5	951	423.9	26	12.2	110	-5.5	52
1124	56.86	-24.6	0	1	-0.584	Engure Marsh	Latvia	36	440	6	644	810.2	30	21.2	76	-8.1	27
1127	51.583	0.616	0	1	-0.068	Thames River	England	117	1400	9.9	667	518.3	12	22.5	65	-0.1	40
1129	46.016	-136.5	0	1	-0.171	Sikhote-Alin State Biosphere Zapodevnik, Primorski Krai	Russia	28	2875	-1.6	975	1136.1	63	18.3	173	-23.4	20
1169	43.46	80.66	23	1	-1.021	Algonquin Provincial Park, Ontario	Canada	44	173	6.4	951	942.6	11	25.6	94	-11.1	61
1170	43.46	80.66	23	1	-0.543	Algonquin Provincial Park, Ontario	Canada	44	140	6.4	951	942.6	11	25.6	94	-11.1	61
1171	43.46	80.66	23	1	-0.625	Algonquin Provincial Park, Ontario	Canada	44	255	6.4	951	942.6	11	25.6	94	-11.1	61
1195	42.23	121.76	0	1	-0.14	Winema National Forest, Oregon	USA	26	1438	8	350	703.8	53	28.9	60	-6.6	6
1197	58.25	-7.25	0	1	-0.477	River Lygna	Norway	20	170	5.6	1602	549.1	30	16	193	-3.9	78
1200	37.3	8.4	0	1	-0.451	Beja, Faro & Setúbal Districts	Portugal	15	680	16.1	553	427.9	67	28.6	89	6.8	1
1201	-19	69.5	0	0	-0.141	Parinacota Province, Tarapaca	Chile	18	1600	9.6	98	255.4	159	20.4	44	-3.1	0
1202	51.8	1.3	1	1	-0.265	Wytham Wood, Oxfordshire, England	UK	21	1140	9.8	615	465.9	14	21.1	60	0.5	36
1203	0.1	-37	0	0	-0.217	Laikipia, Samburu, Isiolo & Baringo Discricts	Kenya	10	1450	17.1	744	56	50	27	129	7.5	22
1204	42	-9	0	1	-0.19	Corsica	Corsica	31	660	11.3	767	521	42	22.7	103	2.5	15
1209	55	1.4	0	1	-0.192	River Tyne, England	UK	34	390	8.7	660	420.4	14	18.9	70	0.4	45
1210	-46.4	-51.8	0	1	-0.205	Possession Island, Crozet Archipelago, Southern Ocean	SO	26	1350	5.5	2341	172.5	15	10.5	241	1.5	150
1216	-54	38	13	1	-0.744	Bird Island, South Georgia, Southern Ocean	SO	17	950	2	1456	251.2	17	8.9	150	-4.6	84
1217	-54	38	13	1	-1.231	Bird Island, South Georgia, Southern Ocean	SO	17	810	2	1456	251.2	17	8.9	150	-4.6	84
1219	-4.3	-55.7	0	1	-1.546	Cousin Island, Indian Ocean	Seychelles	20	140	26.1	2165	60.6	48	29.7	365	23.5	66
1220	39	107	0	1	-0.531	Picnic colony, East River Valley, Rocky Mountains, Colorado	USA	39	720	-1	610	809.1	16	19	61	-20.3	34
1221	47	70.9	0	0	-0.005	St Lawrence Estuary	Canada	37	790	4.4	1066	1066.7	18	25	114	-16.1	67
1223	57.8	8.6	0	1	-0.925	Kilda Archipelago, Scotland	Scotland	23	1800	7.6	1332	330.9	25	14.9	152	1.1	72
1224	57	6.3	0	1	-0.502	Isle of Rum, Scotland	UK	34	2490	6.7	1821	372.9	29	15.1	221	-0.5	89
1225	43.7	-0.2	0	1	-0.315	Marche, Apennines	Italy	19	450	12.1	837	541.9	12	25.6	87	0.4	51
1234	65.6	17	16	1	-0.242	Lake Myvatn	Iceland	21	480	1.9	879	408.4	22	11.5	101	-5.7	45
1236	58.9	112.9	0	1	-0.708	Delta population, Wood Buffalo National Park	Canada	36	4000	-1.8	377	1395.4	47	22.6	63	-29.1	15
1237	48.55	1.2	0	1	-0.811	Plateau Aigre	France	12	300	10.7	763	463.4	18	22.1	87	1.8	48
1239	48	88.8	17	1	-0.264	Isle Royale, Michigan	USA	50	2100	3.2	754	1069.8	25	24.2	84	-18.8	35
1240	48	88.8	17	1	-0.171	Isle Royale, Michigan	USA	50	2800	3.2	754	1069.8	25	24.2	84	-18.8	35
1242	-31	-116	0	0	-0.407	Lancelin Island, Western Australia	Australia	10	410	18.1	567	471.2	80	33.1	115	7.1	10
1243	59.3	-16.8	0	0	-0.377	Nasen Lake	Sweden	12	580	6.2	566	730.8	29	21.7	70	-6.6	27
1244	37	6.5	18	0	-0.116	Doñana National Park, Huelva	Spain	39	770	17.9	525	498.8	65	30.3	81	7.3	1
1246	57.2	-10	0	1	-0.061	Kraghede	Denmark	39	160	7.5	641	595.9	25	19.7	72	-3.4	31
1249	-24	-31.5	19	1	-0.159	Kruger National Park	South Africa	13	2400	22.7	502	360.6	79	33.4	92	8.5	5
1250	38.1	122.9	20	0	-0.028	Point Reyes National Seashore, California	USA	19	2000	12.8	1028	299.1	90	23.5	218	3.8	2
1251	66	-16	0	1	-0.742	Lake Tjulträsk	Sweden	19	140	-0.7	796	747.4	24	14.6	99	-14.4	39
1252	-36.3	-148.6	0	1	-1.188	Blue Cow, Snowy Mountains, New South Wales	Australia	12	250	9.5	1024	484	15	23.7	110	-2.6	61
1254	43.9	71.7	0	1	-0.775	New Hampshire	USA	14	900	5.8	1053	975.2	13	26.5	102	-15.2	69
1255	38.1	122.9	20	1	-0.354	Palomarin Study Area, Point Reyes National Reserve, California	USA	21	160	12.8	1028	299.1	90	23.5	218	3.8	2
1257	40.55	-0.65	0	1	-0.252	Ebro River Delta	Spain	17	500	17.1	541	518.6	42	29.4	85	5.8	13
1258	51.7	2.7	0	1	-0.312	Forest of Dean, Gloucestershire, England	UK	17	130	9.4	883	460	17	20.5	96	0.9	56
1262	32.9	118.5	0	0	-1.112	Tdams grid, San Clemente Island, California	USA	10	790	15.3	224	231.9	95	21.7	48	9.4	0
1264	60.3	-22	0	1	-0.178	Aasla Island	Finland	34	1520	5.1	652	785.7	27	21.3	75	-8.7	33
1266	62	146.8	0	1	-0.306	Nelchina, Alaska	USA	21	2800	-4.2	393	1159.6	48	18.6	64	-26	13
1270	32.7	16.9	0	1	-0.307	Central Mountain Massif, Madeira Island	Portugal	15	340	14.3	704	277.8	66	22.2	112	8.3	6
1271	57.3	6.2	0	1	-0.173	Western Scotland	UK	28	800	7.8	1659	369.7	30	16.1	206	0.5	81
1272	37	6.5	18	0	-0.116	Doñana National Park, Huelva	Spain	26	490	17.9	525	498.8	65	30.3	81	7.3	1
1273	-46.9	-37.8	0	1	-0.181	Marion Island, Prince Edward Archipelago, Indian Ocean	South Africa	14	5000	4.3	2475	146	7	9.3	233	0	182
1274	56	5.5	0	1	-1.139	Argyll and Bute, Scotland	UK	31	820	7.5	1873	414.5	27	17	218	-0.4	95
1275	52.2	2.6	0	1	-1.304	Kielder Forest, England	UK	16	380	8.8	774	457.3	14	19.7	80	0.1	53
1276	55.8	-10.1	0	1	-0.099	Horsens Fjord, Vorsø	Denmark	30	900	7.9	624	610.5	21	19.9	68	-4.4	35
1277	41.1	5.6	0	1	-0.102	Villafáfila Wildelife Reserve, Zamora	Spain	9	900	11.8	391	614.5	35	29.1	48	-0.3	11
1279	51.1	1.7	0	1	-0.322	Porton Down, Wiltshire	England	10	420	9.7	759	480.9	19	21.6	84	0.2	45
1280	66.8	-20.4	0	1	-1.032	Norrbotten	Sweden	35	680	-1.6	499	992.5	40	17.8	75	-20.1	24
1281	42.5	-2.5	0	1	-0.525	Canigou Massif, Pyrenees	France	12	350	4.1	1257	530.6	13	16.9	127	-5.1	76
1283	43.4	-4.8	0	0	-0.304	Fangassier Lagoon, Camargue	France	63	1350	14.2	618	586.2	36	28.7	91	2.1	16
1284	52.1	-8.4	26	1	-0.432	Eastern Westphalia	Germany	35	550	8.8	846	576.4	14	21.5	90	-1.5	58
1285	52.1	-8.4	26	1	-0.132	Eastern Westphalia	Germany	35	540	8.8	846	576.4	14	21.5	90	-1.5	58
1286	38	1.45	0	1	-0.785	Sierras de Burete, Lavia & Cambrón, Murcia	Spain	12	490	16.6	329	579.2	44	32.2	47	3.6	4
1287	60.3	-24.3	21	1	-1.094	Lahti	Findland	15	380	4.7	633	808.4	32	21	79	-9.6	30
1289	40.2	79.3	0	1	-1.479	Applachian Plateau, Pennsylvania	USA	21	120	9.2	1096	865.7	14	27.6	112	-8.9	71
1290	-31.1	71.1	22	1	-1.079	Reserva Nacional Las Chinchillas	Chile	15	263	11.9	187	301.2	113	22.5	46	2.3	0
1291	-31.1	71.1	22	1	-0.719	Reserva Nacional Las Chinchillas	Chile	15	135	11.9	187	301.2	113	22.5	46	2.3	0
1292	52.5	-0.7	0	0	-0.725	Thetford Forest, Norfolk/Sufolk	UK	9	150	9.4	603	487.7	11	20.6	58	-0.5	36
1293	46	0.9	0	1	-1.069	Rocherort, Deux-Sèvres	France	19	450	12.6	799	507.6	24	24.3	99	2.7	43
1294	42.8	74.9	0	1	-0.721	Upland population, Charlotte Valley, Delaware County, New York	USA	10	230	6.7	1065	935.1	14	26	105	-12.1	62
1295	59.9	1.3	0	1	-0.225	Sumburgh Head, Shetland Islands	Shetlands	24	390	7.1	1137	315.7	30	14.4	135	1.1	56
1296	60	-16.3	0	1	-0.914	Västerfärnebo	Sweden	10	300	5.3	618	765.7	29	21.6	78	-8.6	31
1297	65.6	17	16	1	-0.54	Myvatn Lake	Iceland	28	480	1.9	879	408.4	22	11.5	101	-5.7	45
1299	57.3	-18.6	0	0	-0.197	Laus Holmar Islands	Sweden	13	640	7.3	532	645.3	25	20.2	58	-3.2	30
1300	47	122.2	0	1	-0.107	King Creek, Washingon	USA	19	1470	9.2	1425	491.5	47	23.4	201	-0.8	35
1301	42	-9	0	1	-0.446	Crete	Crete	10	1000	11.3	767	521	42	22.7	103	2.5	15
1302	-24	-31.5	19	1	-0.006	Kruger National Park	South Africa	20	2650	22.7	502	360.6	79	33.4	92	8.5	5
1303	-24	-31.5	19	1	-0.041	Kruger National Park	South Africa	20	2050	22.7	502	360.6	79	33.4	92	8.5	5
1304	-24	-31.5	19	1	-0.176	Kruger National Park	South Africa	20	3150	22.7	502	360.6	79	33.4	92	8.5	5
1309	-24	-31.5	19	1	-0.177	Kruger National Park	South Africa	20	4800	22.7	502	360.6	79	33.4	92	8.5	5
1311	34.7	120.1	0	1	-0.107	Coastal population, California	USA	24	420	15	476	355.4	94	27.4	97	4	0
1312	56.2	-16.4	0	1	-0.884	Ottenby, Oland Island, Baltic Sea	Sweden	49	180	7.9	525	658.6	23	21.3	61	-3	30
1313	73.35	-80.53	0	1	-1.249	Taimyr Peninsula, Siberia	Russia	36	873	-11.5	347	1192.3	33	8.3	50	-30.4	18
1314	43.6	-4.53	0	1	-0.421	Langedoc Wetlands,	France	17	840	14.1	681	595.3	34	29.2	102	1.8	21
1315	34.55	106.8	0	1	-0.249	Rio Grande Valley, New Mexico	USA	21	1000	12.7	232	803.4	60	33.7	46	-7.5	10
1316	70.6	155.6	0	1	-0.778	National Petroleum Reserve	USA	18	840	-11.9	138	1308.5	72	10.7	32	-33.1	4
1317	61.02	138.4	0	1	-0.389	Kluane Lake, Yukon, Alaska	Alaska	34	450	-2.9	387	1126.5	42	18.2	61	-25.2	15
1318	42.57	-0.94	0	1	-0.32	Aigüestortes & Estany de Sant Maurici National Park, Lleida	Spain	17	1340	2.6	1338	537.2	12	15.3	141	-7.2	89
1320	41.2	5.05	0	1	-0.725	Aragón	Spain	15	962	12.2	375	611.9	30	29.4	46	0	12
1321	51.85	-16.88	0	1	-0.795	Lezno	Poland	18	170	8.2	536	741.6	35	23.5	76	-6	25
1322	52.5	0.67	0	1	-0.049	Thetford Forest, Breckland, England	UK	31	150	9.4	616	498.8	9	21.4	59	-0.3	39
1323	53.4	1.87	0	1	-0.546	Snake Summit (SK 0891) and Mill Hill, Peak District, England	UK	24	280	7.1	1265	469.7	19	18.3	144	-1.5	80
1324	-33.03	64.2	0	1	-0.605	Chucul, Córdoba, Argentina	Argentina	15	24	16.9	819	472	63	30.1	135	4	14

## Sheet: PCA (2)
	lat	long	red	hq	dds			q	bs	mT	mP	sT	sP	maxT	maxP	minT	minP	lat	long
1	62	-57	0	1	-0.53	Pechoro-Ilych Reserve, Komi Republic	Russia	30	375	-0.9	675	1190.5	29	22.6	83	-22.7	30	62	-57
16	51.78	1.34	1	1	-1.076	Wytham Wood, Oxfordshire, England	UK	30	212	9.8	637	465.9	13	21.1	63	0.5	39	51.78	1.34
17	51.78	1.34	1	1	-0.973	Wytham Wood, Oxfordshire, England	UK	30	133	9.8	637	465.9	13	21.1	63	0.5	39	51.78	1.34
19	51.7	5.15	2	1	-0.282	Skokholm Island, Pembrokeshire, Wales	UK	52	440	9.9	868	433.6	25	19.4	101	2.2	50	51.7	5.15
20	51.7	5.15	2	1	-0.418	Skokholm Island, Pembrokeshire, Wales	UK	52	145	9.9	868	433.6	25	19.4	101	2.2	50	51.7	5.15
21	51.7	5.15	2	0	-0.148	Skokholm Island, Pembrokeshire, Wales	UK	52	150	9.9	868	433.6	25	19.4	101	2.2	50	51.7	5.15
26	51.7	5.15	2	1	-0.495	Skokholm Island, Pembrokeshire, Wales	UK	52	435	9.9	868	433.6	25	19.4	101	2.2	50	51.7	5.15
27	51.7	5.15	2	0	-0.153	Skokholm Island, Pembrokeshire, Wales	UK	52	140	9.9	868	433.6	25	19.4	101	2.2	50	51.7	5.15
68	40.033	88.3	3	0	-0.298	William Trelease Woods, Illinois	USA	50	120	11	975	984.3	23	30.2	112	-8.7	48	40.033	88.3
71	40.033	88.3	3	0	-0.296	William Trelease Woods, Illinois	USA	43	220	11	975	984.3	23	30.2	112	-8.7	48	40.033	88.3
73	40.033	88.3	3	0	-0.412	William Trelease Woods, Illinois	USA	50	140	11	975	984.3	23	30.2	112	-8.7	48	40.033	88.3
76	40.033	88.3	3	0	-0.494	William Trelease Woods, Illinois	USA	53	240	11	975	984.3	23	30.2	112	-8.7	48	40.033	88.3
88	39.983	88.65	3	1	-0.554	Robert Allerton Park, Illinois	USA	26	190	11.1	986	984.5	24	30.4	109	-8.9	47	39.983	88.65
90	39.983	88.65	3	1	-0.615	Robert Allerton Park, Illinois	USA	26	190	11.1	986	984.5	24	30.4	109	-8.9	47	39.983	88.65
91	39.983	88.65	3	1	-0.808	Robert Allerton Park, Illinois	USA	24	140	11.1	986	984.5	24	30.4	109	-8.9	47	39.983	88.65
92	40.033	88.3	3	1	-0.488	William Trelease Woods, Illinois	USA	50	220	11	975	984.3	23	30.2	112	-8.7	48	40.033	88.3
94	40.033	88.3	3	0	-0.305	William Trelease Woods, Illinois	USA	50	150	11	975	984.3	23	30.2	112	-8.7	48	40.033	88.3
102	51.25	0.33	4	1	-0.984	Eastern Wood, Bookham Common, Surrey, England	UK	27	125	9.9	670	487.7	13	22.2	66	0.4	42	51.25	0.33
106	51.25	0.33	4	1	-0.309	Eastern Wood, Bookham Common, Surrey, England	UK	30	150	9.9	670	487.7	13	22.2	66	0.4	42	51.25	0.33
107	51.25	0.33	4	1	-0.94	Eastern Wood, Bookham Common, Surrey, England	UK	27	140	9.9	670	487.7	13	22.2	66	0.4	42	51.25	0.33
123	48.5	-7.5	0	0	-0.024	Alsace	France	42	1010	9.8	653	635.3	25	24.3	78	-1.7	37	48.5	-7.5
195	51.83	2.33	0	1	-0.57	Highnam, Gloucestershire, England	UK	33	100	9.9	693	447.2	14	20.9	71	1.3	45	51.83	2.33
229	36.66	120.83	0	1	-0.666	Panoche Management Area, Diablo Range, California	USA	23	250	14.5	346	611.8	83	35.4	63	-0.2	1	36.66	120.83
526	51.78	1.34	1	1	-0.378	Wytham Wood, Oxfordshire, England	UK	37	115	9.7	667	485.4	13	21.4	66	0.2	41	51.78	1.34
568	65.96	-16.16	6	1	-0.505	Ammarnas, Vasterbotten	Sweden	20	210	0	751	759.8	25	15.5	94	-14	37	65.96	-16.16
569	65.96	-16.16	6	1	-0.626	Ammarnas, Vasterbotten	Sweden	20	205	0	751	759.8	25	15.5	94	-14	37	65.96	-16.16
570	65.96	-16.16	6	1	-1.047	Ammarnas, Vasterbotten	Sweden	20	150	0	751	759.8	25	15.5	94	-14	37	65.96	-16.16
573	65.96	-16.16	6	1	-0.844	Ammarnas, Vasterbotten	Sweden	20	130	0	751	759.8	25	15.5	94	-14	37	65.96	-16.16
576	65.96	-16.16	6	1	-1.106	Ammarnas, Vasterbotten	Sweden	20	120	0	751	759.8	25	15.5	94	-14	37	65.96	-16.16
742	-3.166	-35.583	7	1	-0.09	Serengeti	Tanzania	26	2400	18.3	822	141	85	25.8	201	10.8	5	-3.166	-35.583
779	51.78	1.34	1	1	-0.645	Wytham Wood, Oxfordshire, England	UK	32	130	9.7	667	485.4	13	21.4	66	0.2	41	51.78	1.34
815	34.016	100.66	0	1	-0.756	Rolling Red Praries, Kansas	USA	28	160	16.3	544	834.4	51	35.4	83	-3.6	16	34.016	100.66
827	59.833	-30.0833	0	1	-1.11	Gatchina, Leningradskaya Oblast	Russia	25	610	4.8	646	895.5	31	22.2	80	-10.2	30	59.833	-30.0833
885	-28.75	-24.0833	0	1	-0.837	Rooipoort, Kimberley, Northern Cape Province	South Africa	86	280	18.6	380	543.1	72	34.2	75	1.2	6	-28.75	-24.0833
916	51.916	0.333	0	1	-0.316	Hexton, Hertfordshire	UK	23	248	9.7	655	505.8	10	22	64	0	42	51.916	0.333
917	51.916	0.333	0	0	-0.89	Hexton, Hertfordshire	UK	23	235	9.7	655	505.8	10	22	64	0	42	51.916	0.333
925	47.16	95.25	8	0	-0.476	Itasca State Park, Minnesota	USA	21	200	3.3	669	1206	56	26.1	109	-22.1	14	47.16	95.25
927	47.16	95.25	8	1	-0.55	Itasca State Park, Minnesota	USA	21	240	3.3	669	1206	56	26.1	109	-22.1	14	47.16	95.25
928	47.216	-7.53	0	0	-0.202	Solothurn	Switzerland	106	265	8.2	1011	619.8	19	22.2	119	-2.9	65	47.216	-7.53
939	60.75	-25.5	0	1	-0.707	Etelä-Suomen Laani, Karelia	Finland	40	500	4.2	646	845.5	30	21	81	-10.7	33	60.75	-25.5
954	49.86	116.85	0	1	-0.409	Columbia River, British Columbia	Canada	21	890	6.3	771	762.3	32	25	106	-7.8	45	49.86	116.85
955	44.76	110.55	25	1	-0.452	Yellowstone National Park, Wyoming	USA	38	1687	-1.6	679	828.3	15	19.9	71	-19.1	42	44.76	110.55
958	51.033	1.33	9	1	-0.654	New Forest, Hampshire	UK	26	1715	10.2	778	466.9	21	21.7	86	1	47	51.033	1.33
959	51.033	1.33	9	1	-0.267	New Forest, Hampshire	UK	26	1277	10.2	778	466.9	21	21.7	86	1	47	51.033	1.33
962	52.5	-23.13	11	1	-0.637	Bialowieza Primeval Forest, Bialystok	Poland	20	210	7	563	809.6	34	23.3	77	-7.5	29	52.5	-23.13
963	52.5	-23.13	11	1	-0.387	Bialowieza Primeval Forest, Bialystok	Poland	20	150	7	563	809.6	34	23.3	77	-7.5	29	52.5	-23.13
964	52.5	-23.13	11	1	-0.999	Bialowieza Primeval Forest, Bialystok	Poland	20	125	7	563	809.6	34	23.3	77	-7.5	29	52.5	-23.13
965	52.5	-23.13	11	1	-0.614	Bialowieza Primeval Forest, Bialystok	Poland	20	140	7	563	809.6	34	23.3	77	-7.5	29	52.5	-23.13
966	52.5	-23.13	11	1	-0.625	Bialowieza Primeval Forest, Bialystok	Poland	20	115	7	563	809.6	34	23.3	77	-7.5	29	52.5	-23.13
967	52.5	-23.13	11	1	-0.33	Bialowieza Primeval Forest, Bialystok	Poland	20	130	7	563	809.6	34	23.3	77	-7.5	29	52.5	-23.13
968	52.5	-23.13	11	1	-0.553	Bialowieza Primeval Forest, Bialystok	Poland	20	90	7	563	809.6	34	23.3	77	-7.5	29	52.5	-23.13
969	52.5	-23.13	11	1	-0.711	Bialowieza Primeval Forest, Bialystok	Poland	20	150	7	563	809.6	34	23.3	77	-7.5	29	52.5	-23.13
971	48.13	-114.9	12	0	-0.167	Dornod Aimag	Mongolia	62	1285	1.3	165	1422.9	101	26.8	42	-25.1	2	48.13	-114.9
972	48.13	-114.9	12	1	-0.193	Dornod Aimag	Mongolia	34	700	1.3	165	1422.9	101	26.8	42	-25.1	2	48.13	-114.9
974	48.13	-114.9	12	1	-0.749	Dornod Aimag	Mongolia	26	450	1.3	165	1422.9	101	26.8	42	-25.1	2	48.13	-114.9
975	48.13	-114.9	12	1	-0.649	Dornod Aimag	Mongolia	26	555	1.3	165	1422.9	101	26.8	42	-25.1	2	48.13	-114.9
976	41.66	69.95	0	1	-0.741	Chatham, Massachusetts	USA	47	640	9.5	1122	745.1	12	23.7	113	-4.8	74	41.66	69.95
979	47.9	91.86	0	0	-0.014	Boundary Waters Canoe Area, Minnesota	USA	56	2800	3.2	712	1187.3	50	25.5	104	-21.4	18	47.9	91.86
981	64.983	19.083	0	1	-0.209	Western Iceland	Iceland	63	540	-0.2	1184	427.1	16	9.7	125	-7.7	73	64.983	19.083
982	52.5	-23.13	11	0	-0.03	Bialowieza Primeval Forest, Bialystok	Poland	118	2755	7	563	809.6	34	23.3	77	-7.5	29	52.5	-23.13
983	52.5	-23.13	11	1	-0.074	Bialowieza Primeval Forest, Bialystok	Poland	48	2335	7	563	809.6	34	23.3	77	-7.5	29	52.5	-23.13
984	52.5	-23.13	11	1	-0.222	Bialowieza Primeval Forest, Bialystok	Poland	48	1260	7	563	809.6	34	23.3	77	-7.5	29	52.5	-23.13
985	52.5	-23.13	11	1	-0.179	Bialowieza Primeval Forest, Bialystok	Poland	48	1150	7	563	809.6	34	23.3	77	-7.5	29	52.5	-23.13
1060	55.66	1.783	5	1	-0.527	Farne Islands, Northumberland, UK	UK	29	190	8.6	687	405.2	15	18.7	73	0.2	46	55.66	1.783
1080	-3.16	-35.583	7	1	-0.158	Serengeti	Tanzania	26	2010	18.3	822	141	85	25.8	201	10.8	5	-3.16	-35.583
1081	55.516	1.9	0	1	-0.103	Chillingham, Northumberland, England	UK	33	2700	8	747	413.5	15	18.2	77	-0.4	50	55.516	1.9
1082	53.893	62.25	0	1	-0.961	Labrador	Canada	92	1100	-4	958	1136.7	20	17.6	112	-26.2	60	53.893	62.25
1084	42.26	83.73	0	1	-0.381	George reserve, Ann Arbor, Michigan	USA	43	1625	8.8	819	959	19	28	86	-9.4	44	42.26	83.73
1087	-3.16	-35.55	0	1	-0.247	Ngorongoro Crater	Tanzania	30	2650	18.3	822	141	85	25.8	201	10.8	5	-3.16	-35.55
1088	49.45	123.55	0	1	-0.198	Northern Hudson Bay	Canada	113	870	6.9	1351	551.1	54	20.6	216	-3.3	40	49.45	123.55
1096	44.76	110.53	25	0	-0.051	Yellowstone National Park, Wyoming	USA	39	1938	-1.6	673	827.3	14	20	70	-19	42	44.76	110.53
1104	54.116	165.96	0	0	-1.041	Akutan (Cape Morgan), Alaska	USA	46	2600	2.5	951	423.9	26	12.2	110	-5.5	52	54.116	165.96
1124	56.86	-24.6	0	1	-0.584	Engure Marsh	Latvia	36	440	6	644	810.2	30	21.2	76	-8.1	27	56.86	-24.6
1127	51.583	0.616	0	1	-0.068	Thames River	England	117	1400	9.9	667	518.3	12	22.5	65	-0.1	40	51.583	0.616
1129	46.016	-136.5	0	1	-0.171	Sikhote-Alin State Biosphere Zapodevnik, Primorski Krai	Russia	28	2875	-1.6	975	1136.1	63	18.3	173	-23.4	20	46.016	-136.5
1169	43.46	80.66	23	1	-1.021	Algonquin Provincial Park, Ontario	Canada	44	173	6.4	951	942.6	11	25.6	94	-11.1	61	43.46	80.66
1170	43.46	80.66	23	1	-0.543	Algonquin Provincial Park, Ontario	Canada	44	140	6.4	951	942.6	11	25.6	94	-11.1	61	43.46	80.66
1171	43.46	80.66	23	1	-0.625	Algonquin Provincial Park, Ontario	Canada	44	255	6.4	951	942.6	11	25.6	94	-11.1	61	43.46	80.66
1195	42.23	121.76	0	1	-0.14	Winema National Forest, Oregon	USA	26	1438	8	350	703.8	53	28.9	60	-6.6	6	42.23	121.76
1197	58.25	-7.25	0	1	-0.477	River Lygna	Norway	20	170	5.6	1602	549.1	30	16	193	-3.9	78	58.25	-7.25
1200	37.3	8.4	0	1	-0.451	Beja, Faro & Setúbal Districts	Portugal	15	680	16.1	553	427.9	67	28.6	89	6.8	1	37.3	8.4
1201	-19	69.5	0	0	-0.141	Parinacota Province, Tarapaca	Chile	18	1600	9.6	98	255.4	159	20.4	44	-3.1	0	-19	69.5
1202	51.8	1.3	1	1	-0.265	Wytham Wood, Oxfordshire, England	UK	21	1140	9.8	615	465.9	14	21.1	60	0.5	36	51.8	1.3
1203	0.1	-37	0	0	-0.217	Laikipia, Samburu, Isiolo & Baringo Discricts	Kenya	10	1450	17.1	744	56	50	27	129	7.5	22	0.1	-37
1204	42	-9	0	1	-0.19	Corsica	Corsica	31	660	11.3	767	521	42	22.7	103	2.5	15	42	-9
1209	55	1.4	0	1	-0.192	River Tyne, England	UK	34	390	8.7	660	420.4	14	18.9	70	0.4	45	55	1.4
1210	-46.4	-51.8	0	1	-0.205	Possession Island, Crozet Archipelago, Southern Ocean	SO	26	1350	5.5	2341	172.5	15	10.5	241	1.5	150	-46.4	-51.8
1216	-54	38	13	1	-0.744	Bird Island, South Georgia, Southern Ocean	SO	17	950	2	1456	251.2	17	8.9	150	-4.6	84	-54	38
1217	-54	38	13	1	-1.231	Bird Island, South Georgia, Southern Ocean	SO	17	810	2	1456	251.2	17	8.9	150	-4.6	84	-54	38
1219	-4.3	-55.7	0	1	-1.546	Cousin Island, Indian Ocean	Seychelles	20	140	26.1	2165	60.6	48	29.7	365	23.5	66	-4.3	-55.7
1220	39	107	0	1	-0.531	Picnic colony, East River Valley, Rocky Mountains, Colorado	USA	39	720	-1	610	809.1	16	19	61	-20.3	34	39	107
1221	47	70.9	0	0	-0.005	St Lawrence Estuary	Canada	37	790	4.4	1066	1066.7	18	25	114	-16.1	67	47	70.9
1223	57.8	8.6	0	1	-0.925	Kilda Archipelago, Scotland	Scotland	23	1800	7.6	1332	330.9	25	14.9	152	1.1	72	57.8	8.6
1224	57	6.3	0	1	-0.502	Isle of Rum, Scotland	UK	34	2490	6.7	1821	372.9	29	15.1	221	-0.5	89	57	6.3
1225	43.7	-0.2	0	1	-0.315	Marche, Apennines	Italy	19	450	12.1	837	541.9	12	25.6	87	0.4	51	43.7	-0.2
1234	65.6	17	16	1	-0.242	Lake Myvatn	Iceland	21	480	1.9	879	408.4	22	11.5	101	-5.7	45	65.6	17
1236	58.9	112.9	0	1	-0.708	Delta population, Wood Buffalo National Park	Canada	36	4000	-1.8	377	1395.4	47	22.6	63	-29.1	15	58.9	112.9
1237	48.55	1.2	0	1	-0.811	Plateau Aigre	France	12	300	10.7	763	463.4	18	22.1	87	1.8	48	48.55	1.2
1239	48	88.8	17	1	-0.264	Isle Royale, Michigan	USA	50	2100	3.2	754	1069.8	25	24.2	84	-18.8	35	48	88.8
1240	48	88.8	17	1	-0.171	Isle Royale, Michigan	USA	50	2800	3.2	754	1069.8	25	24.2	84	-18.8	35	48	88.8
1242	-31	-116	0	0	-0.407	Lancelin Island, Western Australia	Australia	10	410	18.1	567	471.2	80	33.1	115	7.1	10	-31	-116
1243	59.3	-16.8	0	0	-0.377	Nasen Lake	Sweden	12	580	6.2	566	730.8	29	21.7	70	-6.6	27	59.3	-16.8
1244	37	6.5	18	0	-0.116	Doñana National Park, Huelva	Spain	39	770	17.9	525	498.8	65	30.3	81	7.3	1	37	6.5
1246	57.2	-10	0	1	-0.061	Kraghede	Denmark	39	160	7.5	641	595.9	25	19.7	72	-3.4	31	57.2	-10
1249	-24	-31.5	19	1	-0.159	Kruger National Park	South Africa	13	2400	22.7	502	360.6	79	33.4	92	8.5	5	-24	-31.5
1250	38.1	122.9	20	0	-0.028	Point Reyes National Seashore, California	USA	19	2000	12.8	1028	299.1	90	23.5	218	3.8	2	38.1	122.9
1251	66	-16	0	1	-0.742	Lake Tjulträsk	Sweden	19	140	-0.7	796	747.4	24	14.6	99	-14.4	39	66	-16
1252	-36.3	-148.6	0	1	-1.188	Blue Cow, Snowy Mountains, New South Wales	Australia	12	250	9.5	1024	484	15	23.7	110	-2.6	61	-36.3	-148.6
1254	43.9	71.7	0	1	-0.775	New Hampshire	USA	14	900	5.8	1053	975.2	13	26.5	102	-15.2	69	43.9	71.7
1255	38.1	122.9	20	1	-0.354	Palomarin Study Area, Point Reyes National Reserve, California	USA	21	160	12.8	1028	299.1	90	23.5	218	3.8	2	38.1	122.9
1257	40.55	-0.65	0	1	-0.252	Ebro River Delta	Spain	17	500	17.1	541	518.6	42	29.4	85	5.8	13	40.55	-0.65
1258	51.7	2.7	0	1	-0.312	Forest of Dean, Gloucestershire, England	UK	17	130	9.4	883	460	17	20.5	96	0.9	56	51.7	2.7
1262	32.9	118.5	0	0	-1.112	Tdams grid, San Clemente Island, California	USA	10	790	15.3	224	231.9	95	21.7	48	9.4	0	32.9	118.5
1264	60.3	-22	0	1	-0.178	Aasla Island	Finland	34	1520	5.1	652	785.7	27	21.3	75	-8.7	33	60.3	-22
1266	62	146.8	0	1	-0.306	Nelchina, Alaska	USA	21	2800	-4.2	393	1159.6	48	18.6	64	-26	13	62	146.8
1270	32.7	16.9	0	1	-0.307	Central Mountain Massif, Madeira Island	Portugal	15	340	14.3	704	277.8	66	22.2	112	8.3	6	32.7	16.9
1271	57.3	6.2	0	1	-0.173	Western Scotland	UK	28	800	7.8	1659	369.7	30	16.1	206	0.5	81	57.3	6.2
1272	37	6.5	18	0	-0.116	Doñana National Park, Huelva	Spain	26	490	17.9	525	498.8	65	30.3	81	7.3	1	37	6.5
1273	-46.9	-37.8	0	1	-0.181	Marion Island, Prince Edward Archipelago, Indian Ocean	South Africa	14	5000	4.3	2475	146	7	9.3	233	0	182	-46.9	-37.8
1274	56	5.5	0	1	-1.139	Argyll and Bute, Scotland	UK	31	820	7.5	1873	414.5	27	17	218	-0.4	95	56	5.5
1275	52.2	2.6	0	1	-1.304	Kielder Forest, England	UK	16	380	8.8	774	457.3	14	19.7	80	0.1	53	52.2	2.6
1276	55.8	-10.1	0	1	-0.099	Horsens Fjord, Vorsø	Denmark	30	900	7.9	624	610.5	21	19.9	68	-4.4	35	55.8	-10.1
1277	41.1	5.6	0	1	-0.102	Villafáfila Wildelife Reserve, Zamora	Spain	9	900	11.8	391	614.5	35	29.1	48	-0.3	11	41.1	5.6
1279	51.1	1.7	0	1	-0.322	Porton Down, Wiltshire	England	10	420	9.7	759	480.9	19	21.6	84	0.2	45	51.1	1.7
1280	66.8	-20.4	0	1	-1.032	Norrbotten	Sweden	35	680	-1.6	499	992.5	40	17.8	75	-20.1	24	66.8	-20.4
1281	42.5	-2.5	0	1	-0.525	Canigou Massif, Pyrenees	France	12	350	4.1	1257	530.6	13	16.9	127	-5.1	76	42.5	-2.5
1283	43.4	-4.8	0	0	-0.304	Fangassier Lagoon, Camargue	France	63	1350	14.2	618	586.2	36	28.7	91	2.1	16	43.4	-4.8
1284	52.1	-8.4	26	1	-0.432	Eastern Westphalia	Germany	35	550	8.8	846	576.4	14	21.5	90	-1.5	58	52.1	-8.4
1285	52.1	-8.4	26	1	-0.132	Eastern Westphalia	Germany	35	540	8.8	846	576.4	14	21.5	90	-1.5	58	52.1	-8.4
1286	38	1.45	0	1	-0.785	Sierras de Burete, Lavia & Cambrón, Murcia	Spain	12	490	16.6	329	579.2	44	32.2	47	3.6	4	38	1.45
1287	60.3	-24.3	21	1	-1.094	Lahti	Findland	15	380	4.7	633	808.4	32	21	79	-9.6	30	60.3	-24.3
1289	40.2	79.3	0	1	-1.479	Applachian Plateau, Pennsylvania	USA	21	120	9.2	1096	865.7	14	27.6	112	-8.9	71	40.2	79.3
1290	-31.1	71.1	22	1	-1.079	Reserva Nacional Las Chinchillas	Chile	15	263	11.9	187	301.2	113	22.5	46	2.3	0	-31.1	71.1
1291	-31.1	71.1	22	1	-0.719	Reserva Nacional Las Chinchillas	Chile	15	135	11.9	187	301.2	113	22.5	46	2.3	0	-31.1	71.1
1292	52.5	-0.7	0	0	-0.725	Thetford Forest, Norfolk/Sufolk	UK	9	150	9.4	603	487.7	11	20.6	58	-0.5	36	52.5	-0.7
1293	46	0.9	0	1	-1.069	Rocherort, Deux-Sèvres	France	19	450	12.6	799	507.6	24	24.3	99	2.7	43	46	0.9
1294	42.8	74.9	0	1	-0.721	Upland population, Charlotte Valley, Delaware County, New York	USA	10	230	6.7	1065	935.1	14	26	105	-12.1	62	42.8	74.9
1295	59.9	1.3	0	1	-0.225	Sumburgh Head, Shetland Islands	Shetlands	24	390	7.1	1137	315.7	30	14.4	135	1.1	56	59.9	1.3
1296	60	-16.3	0	1	-0.914	Västerfärnebo	Sweden	10	300	5.3	618	765.7	29	21.6	78	-8.6	31	60	-16.3
1297	65.6	17	16	1	-0.54	Myvatn Lake	Iceland	28	480	1.9	879	408.4	22	11.5	101	-5.7	45	65.6	17
1299	57.3	-18.6	0	0	-0.197	Laus Holmar Islands	Sweden	13	640	7.3	532	645.3	25	20.2	58	-3.2	30	57.3	-18.6
1300	47	122.2	0	1	-0.107	King Creek, Washingon	USA	19	1470	9.2	1425	491.5	47	23.4	201	-0.8	35	47	122.2
1301	42	-9	0	1	-0.446	Crete	Crete	10	1000	11.3	767	521	42	22.7	103	2.5	15	42	-9
1302	-24	-31.5	19	1	-0.006	Kruger National Park	South Africa	20	2650	22.7	502	360.6	79	33.4	92	8.5	5	-24	-31.5
1303	-24	-31.5	19	1	-0.041	Kruger National Park	South Africa	20	2050	22.7	502	360.6	79	33.4	92	8.5	5	-24	-31.5
1304	-24	-31.5	19	1	-0.176	Kruger National Park	South Africa	20	3150	22.7	502	360.6	79	33.4	92	8.5	5	-24	-31.5
1309	-24	-31.5	19	1	-0.177	Kruger National Park	South Africa	20	4800	22.7	502	360.6	79	33.4	92	8.5	5	-24	-31.5
1311	34.7	120.1	0	1	-0.107	Coastal population, California	USA	24	420	15	476	355.4	94	27.4	97	4	0	34.7	120.1
1312	56.2	-16.4	0	1	-0.884	Ottenby, Oland Island, Baltic Sea	Sweden	49	180	7.9	525	658.6	23	21.3	61	-3	30	56.2	-16.4
1313	73.35	-80.53	0	1	-1.249	Taimyr Peninsula, Siberia	Russia	36	873	-11.5	347	1192.3	33	8.3	50	-30.4	18	73.35	-80.53
1314	43.6	-4.53	0	1	-0.421	Langedoc Wetlands,	France	17	840	14.1	681	595.3	34	29.2	102	1.8	21	43.6	-4.53
1315	34.55	106.8	0	1	-0.249	Rio Grande Valley, New Mexico	USA	21	1000	12.7	232	803.4	60	33.7	46	-7.5	10	34.55	106.8
1316	70.6	155.6	0	1	-0.778	National Petroleum Reserve	USA	18	840	-11.9	138	1308.5	72	10.7	32	-33.1	4	70.6	155.6
1317	61.02	138.4	0	1	-0.389	Kluane Lake, Yukon, Alaska	Alaska	34	450	-2.9	387	1126.5	42	18.2	61	-25.2	15	61.02	138.4
1318	42.57	-0.94	0	1	-0.32	Aigüestortes & Estany de Sant Maurici National Park, Lleida	Spain	17	1340	2.6	1338	537.2	12	15.3	141	-7.2	89	42.57	-0.94
1320	41.2	5.05	0	1	-0.725	Aragón	Spain	15	962	12.2	375	611.9	30	29.4	46	0	12	41.2	5.05
1321	51.85	-16.88	0	1	-0.795	Lezno	Poland	18	170	8.2	536	741.6	35	23.5	76	-6	25	51.85	-16.88
1322	52.5	0.67	0	1	-0.049	Thetford Forest, Breckland, England	UK	31	150	9.4	616	498.8	9	21.4	59	-0.3	39	52.5	0.67
1323	53.4	1.87	0	1	-0.546	Snake Summit (SK 0891) and Mill Hill, Peak District, England	UK	24	280	7.1	1265	469.7	19	18.3	144	-1.5	80	53.4	1.87
1324	-33.03	64.2	0	1	-0.605	Chucul, Córdoba, Argentina	Argentina	15	24	16.9	819	472	63	30.1	135	4	14	-33.03	64.2

## Sheet: Hoja1
Cuenta de Analyses
Analyses	Total
GLMM	14
PGLS + GLMM	146
Total general	160

## Sheet: Supplementary Dataset
TAXA							LOCALITIES					SOURCES OF TIME SERIES OF ANNUAL POPULATION ABUNDANCE				MODELLING		KÖPPEN-GEIGER CLIMATES				CLIMATE PREDICTORS (Bioclim Code = BC - for calculations see http://www.worldclim.org/formats)								CONTROL PREDICTORS		RESPONSE (estimated from time series of annual population abundance)	TIME SERIES OF ANNUAL ABUNDANCE
CODE	Phylum	Order	Family	Genus	Species	Common name	Latitude	Longitude	Study area	Country	Reduntant locality (>1 species/locality - bootstrapping)	Author	Year	Journal	Secondary source	Analyses	High-quality time series	Main	Precipitation	Temperature	Type	Mean temperature (mT, °C): BC = BIO1	Mean precipitation (mP, mm): BC = BIO12	Seasonality of temperature (sT, °C): BC = BIO4	Seasonality of precipitation (sP): BC = BIO15	Temperature of coldest month (minT, °C): BC = BIO6	Precipitation of driest month (minP, mm): BC =BIO14	Temperature of hottest month (maxT, °C): BC = BIO5	Precipitation of wettest month (maxP, mm): BC = BIO13	Time-series length (q, years)	Body size (BS, mm)	Gompertz density-feedback strength	y1	y2	y3	y4	y5	y6	y7	y8	y9	y10	y11	y12	y13	y14	y15	y16	y17
1	Aves	Galliformes	Tetraonidae	Bonasa	bonasia	Hazel grouse	62.0 N	57.0 E	Pechoro-Ilych Reserve, Komi Republic	Russia	No	Beshkarev, AB, Swenson, JE, Angelstam, P, Andren, H & Blagovidov, AB	1994	Oikos, 71:375-380	Clarke et al 2010 - Methods in Ecology and Evolution 1:253-262 (GPDD)	PGLS + GLMM	Yes	D	f	c	Dfc	-0.9	675	1190.5	29	-22.7	30	22.6	83	30	375	-0.53	130	10	40	90	220	300	285	100	80	110	55	40	10	10	100	115	50
16	Mammalia	Rodentia	Muridae	Apodemus	sylvaticus	Wood mouse	51.78 N	1.34 W	Wytham Wood, Oxfordshire, England	UK	1	Southern, HN	1979	Ecology of Small Mammals. Stoddart, DM (ed.). Chapman & Hall, London	Clarke et al 2010 - Methods in Ecology and Evolution 1:253-262 (GPDD)	PGLS + GLMM	Yes	C	f	b	Cfb	9.8	637	465.9	13	0.5	39	21.1	63	30	212	-1.076	36	58	19	55	10	35	20	36	38	38	64	54	38	44	32	38	90
17	Mammalia	Rodentia	Cricetidae	Myodes	glareolus	Bank vole	51.78 N	1.34 W	Wytham Wood, Oxfordshire, England	UK	1	Fryxell, JM, Falls, JB, Falls, AE, Brooks, RJ	1979	Ecology of Small Mammals. Stoddart, DM (ed.). Chapman & Hall, London	Clarke et al 2010 - Methods in Ecology and Evolution 1:253-262 (GPDD)	PGLS + GLMM	Yes	C	f	b	Cfb	9.8	637	465.9	13	0.5	39	21.1	63	30	133	-0.973	8	68	92	38	62	40	112	64	61	76	35	122	57	63	77	85	20
19	Aves	Charadriiformes	Haematopodidae	Haematopus	ostralegus	Eurasian oystercatcher	51.41 N	5.15 W	Skokholm Island, Pembrokeshire, Wales	UK	2	Xirouchakis, SM	1983	Oikos, 41:378-384	Clarke et al 2010 - Methods in Ecology and Evolution 1:253-262 (GPDD)	PGLS + GLMM	Yes	C	f	b	Cfb	9.9	868	433.6	25	2.2	50	19.4	101	52	440	-0.282	79.9945	79.9945	79.9945	79.9945	79.9945	103.993	89.9938	89.9938	71.995	61.9957	73.9949	69.9952	77.9946	NA	NA	NA	NA
20	Aves	Passeriformes	Motacillidae	Anthus	pratensis	Meadow pipit	51.7 N	5.15 W	Skokholm Island, Pembrokeshire, Wales	UK	2	Williamson, MH	1983	Oikos, 41:378-384	Clarke et al 2010 - Methods in Ecology and Evolution 1:253-262 (GPDD)	PGLS + GLMM	Yes	C	f	b	Cfb	9.9	868	433.6	25	2.2	50	19.4	101	52	145	-0.418	89.9938	77.9946	81.9943	87.9939	77.9946	85.9941	81.9943	69.9952	63.9956	61.9957	75.9948	79.9945	63.9956	NA	NA	NA	NA
21	Aves	Passeriformes	Muscicapidae	Oenanthe	oenanthe	Northern wheatear	51.7 N	5.15 W	Skokholm Island, Pembrokeshire, Wales	UK	2	Peek, J, Dennis, B & Hershey, T	1983	Oikos, 41:378-384	Clarke et al 2010 - Methods in Ecology and Evolution 1:253-262 (GPDD)	PGLS + GLMM	No	C	f	b	Cfb	9.9	868	433.6	25	2.2	50	19.4	101	52	150	-0.148	19.9986	25.9982	23.9983	17.9988	25.9982	25.9982	27.9981	23.9983	19.9986	17.9988	23.9983	19.9986	23.9983	NA	NA	NA	NA
26	Aves	Passeriformes	Corvidae	Corvus	corone	Carrion crow	51.7 N	5.15 W	Skokholm Island, Pembrokeshire, Wales	UK	2	Dublin, HT, Sinclair, ARE, Boutin, S, Anderson, E Jago, M & Arcese, P	1983	Oikos, 41:378-384	Clarke et al 2010 - Methods in Ecology and Evolution 1:253-262 (GPDD)	PGLS + GLMM	Yes	C	f	b	Cfb	9.9	868	433.6	25	2.2	50	19.4	101	52	435	-0.495	13.999	17.9988	19.9986	19.9986	23.9983	21.9985	17.9988	15.9989	13.999	13.999	17.9988	13.999	17.9988	NA	NA	NA	NA
27	Aves	Passeriformes	Prunellidae	Prunella	modularis	Hedge sparrow (Dunnock)	51.7 N	5.15 W	Skokholm Island, Pembrokeshire, Wales	UK	2	D.W. Yalden & J.W. Pearce-Higgins	1983	Oikos, 41:378-384	Clarke et al 2010 - Methods in Ecology and Evolution 1:253-262 (GPDD)	PGLS + GLMM	No	C	f	b	Cfb	9.9	868	433.6	25	2.2	50	19.4	101	52	140	-0.153	9.99931	11.9992	9.99931	11.9992	13.999	11.9992	13.999	13.999	13.999	7.99945	5.99959	1.99986	1.99986	NA	NA	NA	NA
68	Aves	Passeriformes	Troglodytidae	Troglodytes	aedon	House wren	40.033 N	88.3 W	William Trelease Woods, Illinois	USA	3	Prince, PA; Rothery, P; Croxall, JP; Wood, AG	1982	Illinois Biological Monographs, 52:1-136	Clarke et al 2010 - Methods in Ecology and Evolution 1:253-262 (GPDD)	PGLS + GLMM	No	D	f	a	Dfa	11	975	984.3	23	-8.7	48	30.2	112	50	120	-0.298	1.99986	1.99986	NA	NA	NA	NA	NA	5.99959	7.99945	15.9989	27.9981	NA	1.99986	19.9986	39.9972	61.9957	79.9945
71	Aves	Passeriformes	Sturnidae	Sturnus	vulgaris	Common starling	40.033 N	88.3 W	William Trelease Woods, Illinois	USA	3	Petty, SJ; Fawkes, BL	1982	Illinois Biological Monographs, 52:1-136	Clarke et al 2010 - Methods in Ecology and Evolution 1:253-262 (GPDD)	PGLS + GLMM	No	D	f	a	Dfa	11	975	984.3	23	-8.7	48	30.2	112	43	220	-0.296	15.9989	19.9986	49.9965	31.9978	NA	NA	17.9988	31.9978	33.9977	43.997	31.9978	39.9972	57.996	41.9971	31.9978	43.997	39.9972
73	Aves	Passeriformes	Emberizidae	Passerina	cyanea	Indigo bunting	40.033 N	88.3 W	William Trelease Woods, Illinois	USA	3	Minot, EO & Perrins, CM	1982	Illinois Biological Monographs, 52:1-136	Clarke et al 2010 - Methods in Ecology and Evolution 1:253-262 (GPDD)	PGLS + GLMM	No	D	f	a	Dfa	11	975	984.3	23	-8.7	48	30.2	112	50	140	-0.412	33.9977	17.9988	NA	NA	NA	NA	NA	43.997	41.9971	39.9972	39.9972	NA	13.999	29.9979	49.9965	53.9963	53.9963
76	Aves	Piciformes	Picidae	Melanerpes	carolinus	Red-bellied woodpecker	40.033 N	88.3 W	William Trelease Woods, Illinois	USA	3	Oli, MK; Armitage, KB	1982	Illinois Biological Monographs, 52:1-136	Clarke et al 2010 - Methods in Ecology and Evolution 1:253-262 (GPDD)	PGLS + GLMM	No	D	f	a	Dfa	11	975	984.3	23	-8.7	48	30.2	112	53	240	-0.494	17.3896	22.9738	14.7746	16.6137	NA	NA	NA	18.4181	NA	NA	NA	32.9952	32.9896	11.4185	23.5006	20.5031	35.988
88	Aves	Passeriformes	Parulidae	Icteria	virens	Yellow-breasted chat	39.983 N	88.65 W	Robert Allerton Park, Illinois	USA	3	Moller, AP	1982	Illinois Biological Monographs, 52:1-136	Clarke et al 2010 - Methods in Ecology and Evolution 1:253-262 (GPDD)	PGLS + GLMM	Yes	D	f	a	Dfa	11.1	986	984.5	24	-8.9	47	30.4	109	26	190	-0.554	16	8	8	22	18	16	17	10	17	7	10	8	17	9	10	8	11
90	Aves	Passeriformes	Emberizidae	Pipilo	erythrophthalmus	Rufous-sided towhee	39.983 N	88.65 W	Robert Allerton Park, Illinois	USA	3	Wesolowski, T & Tomialojc, L	1982	Illinois Biological Monographs, 52:1-136	Clarke et al 2010 - Methods in Ecology and Evolution 1:253-262 (GPDD)	PGLS + GLMM	Yes	D	f	a	Dfa	11.1	986	984.5	24	-8.9	47	30.4	109	26	190	-0.615	13	10	8	14	16	9	15	16	15	13	18	23	28	19	13	13	9
91	Aves	Passeriformes	Emberizidae	Spizella	pusilla	Field sparrow	39.983 N	88.65 W	Robert Allerton Park, Illinois	USA	3	Erlien, D & Tester, J	1982	Illinois Biological Monographs, 52:1-136	Clarke et al 2010 - Methods in Ecology and Evolution 1:253-262 (GPDD)	PGLS + GLMM	Yes	D	f	a	Dfa	11.1	986	984.5	24	-8.9	47	30.4	109	24	140	-0.808	37	54	32	45	54	38	33	40	30	28	23	2	25	35	27	23	20
92	Aves	Passeriformes	Turdidae	Turdus	migratorius	American robin	40.033 N	88.3 W	William Trelease Woods, Illinois	USA	3	Kendeigh, SC	1982	Illinois Biological Monographs, 52:1-136	Clarke et al 2010 - Methods in Ecology and Evolution 1:253-262 (GPDD)	PGLS + GLMM	Yes	D	f	a	Dfa	11	975	984.3	23	-8.7	48	30.2	112	50	220	-0.488	1.99986	3.99972	1.99986	5.99959	1.99986	7.99945	7.99945	5.99959	17.9988	5.99959	9.99931	5.99959	9.99931	5.99959	11.9992	19.9986	9.99931
94	Aves	Passeriformes	Vireonidae	Vireo	olivaceus	Red-eyed vireo	40.033 N	88.3 W	William Trelease Woods, Illinois	USA	3	Berg, A; Jonsson, M; Lindberg, T; Kallerink, K-G	1982	Illinois Biological Monographs, 52:1-136	Clarke et al 2010 - Methods in Ecology and Evolution 1:253-262 (GPDD)	PGLS + GLMM	No	D	f	a	Dfa	11	975	984.3	23	-8.7	48	30.2	112	50	150	-0.305	17.9988	13.999	NA	NA	NA	NA	NA	15.9989	7.99945	7.99945	9.99931	NA	NA	NA	25.9982	27.9981	19.9986
102	Aves	Passeriformes	Certhiidae	Certhia	familiaris	Treecreeper	51.25 N	0.33 W	Eastern Wood, Bookham Common, Surrey, England	UK	4	Enemar, A, Nilsson, L & Sjostrand, B	1976	The London Naturalist, 55:23-42	Clarke et al 2010 - Methods in Ecology and Evolution 1:253-262 (GPDD)	PGLS + GLMM	Yes	C	f	b	Cfb	9.9	670	487.7	13	0.4	42	22.2	66	27	125	-0.984	10.7587	21.5883	18.9115	26.4868	28.8376	10.2155	27.9603	17.7278	NA	13.3842	29.1346	36.8074	14.444	36.1076	18.9618	13.6571	29.2894
106	Aves	Passeriformes	Muscicapidae	Erithacus	rubecula	European robin	51.25 N	0.33 W	Eastern Wood, Bookham Common, Surrey, England	UK	4	Jefferies, DJ & Pendlebury, J B	1976	The London Naturalist, 55:23-42	Clarke et al 2010 - Methods in Ecology and Evolution 1:253-262 (GPDD)	PGLS + GLMM	Yes	C	f	b	Cfb	9.9	670	487.7	13	0.4	42	22.2	66	30	150	-0.309	24	19	24	22	28	28	30	33	30	23	24	NA	32	29	23	27	32
107	Aves	Passeriformes	Sylviidae	Sylvia	atricapilla	Blackcap	51.25 N	0.33 W	Eastern Wood, Bookham Common, Surrey, England	UK	4	Kendeigh, SC	1976	The London Naturalist, 55:23-42	Clarke et al 2010 - Methods in Ecology and Evolution 1:253-262 (GPDD)	PGLS + GLMM	Yes	C	f	b	Cfb	9.9	670	487.7	13	0.4	42	22.2	66	27	140	-0.94	37.7184	38.8612	44.6194	35.3877	24.5518	33.504	25.0281	35.4244	NA	34.7636	46.2237	20.0228	43.921	36.1207	55.1292	35.6983	47.0475
123	Aves	Ciconiiformes	Ciconiidae	Ciconia	ciconia	White stork	48.5 N	7.5 E	Alsace	France	No	Reed, ET; Calvert, AM	1989	Ibis, 132:27-35	Clarke et al 2010 - Methods in Ecology and Evolution 1:253-262 (GPDD)	PGLS + GLMM	No	C	f	b	Cfb	9.8	653	635.3	25	-1.7	37	24.3	78	42	1010	-0.024	255.982	279.981	355.975	347.976	327.977	207.986	229.984	243.983	219.985	195.986	239.983	263.982	269.981	263.982	271.981	287.98	239.983
195	Aves	Passeriformes	Sylviidae	Phylloscopus	collybita	Chiffchaff	51.83 N	2.33 W	Highnam, Gloucestershire, England	UK	No	Bregnballe, T	1961	British Birds, 54:100-106	Clarke et al 2010 - Methods in Ecology and Evolution 1:253-262 (GPDD)	PGLS + GLMM	Yes	C	f	b	Cfb	9.9	693	447.2	14	1.3	45	20.9	71	33	100	-0.57	5	4	5	8	8	10	12	13	11	10	11	12	8	10	12	9	17
229	Aves	Galliformes	Odontophoridae	Callipepla	californica	California quail	36.66 N	120.83 W	Panoche Management Area, Diablo Range, California	USA	No	Anders Hedenström · Jan Pettersson	1988	Journal of Wildlife Management, 52:469-477	Clarke et al 2010 - Methods in Ecology and Evolution 1:253-262 (GPDD)	PGLS + GLMM	Yes	C	f	b	Cfb	14.5	346	611.8	83	-0.2	1	35.4	63	23	250	-0.666	125	180	120	125	220	320	500	250	175	450	800	240	600	490	240	242	510
526	Aves	Passeriformes	Paridae	Parus	caeruleus	Blue tit	51.78 N	1.34 W	Wytham Wood, Oxfordshire, England	UK	1	Packer, C, Pusey, AE, Rowley, H, Gilbert, DA, Martenson, J, O'Brien, SJ	1986	Journal of Animal Ecology, 55:331-350	Clarke et al 2010 - Methods in Ecology and Evolution 1:253-262 (GPDD)	PGLS + GLMM	Yes	C	f	b	Cfb	9.7	667	485.4	13	0.2	41	21.4	66	37	115	-0.378	15.9989	35.9975	55.9961	65.9954	65.9954	31.9978	25.9982	33.9977	23.9983	25.9982	61.9957	33.9977	39.9972	49.9965	87.9939	41.9971	81.9943
568	Aves	Passeriformes	Turdidae	Turdus	iliacus	Redwing	65.96 N	16.16 E	Ammarnas, Vasterbotten	Sweden	6	Lima, M; Stenseth, NC; Yoccoz, NG; Jaksic, FM	1984	Annuals Zoologici Fennici, 21:321-338	Clarke et al 2010 - Methods in Ecology and Evolution 1:253-262 (GPDD)	PGLS + GLMM	Yes	D	f	c	Dfc	0	751	759.8	25	-14	37	15.5	94	20	210	-0.505	19	19	35	20	30	50	38	31	36	42	37	38	22	23	17	18	16
569	Aves	Passeriformes	Turdidae	Turdus	pilaris	Fieldfare	65.96 N	16.16 E	Ammarnas, Vasterbotten	Sweden	6	Enemar, A, Nilsson, L & Sjostrand, B	1984	Annuals Zoologici Fennici, 21:321-338	Clarke et al 2010 - Methods in Ecology and Evolution 1:253-262 (GPDD)	PGLS + GLMM	Yes	D	f	c	Dfc	0	751	759.8	25	-14	37	15.5	94	20	205	-0.626	3	10	13	5	15	35	16	15	14	23	15	17	11	4	6	11	6
570	Aves	Passeriformes	Emberizidae	Emberiza	schoeniclus	Reed bunting	65.96 N	16.16 E	Ammarnas, Vasterbotten	Sweden	6	Delord, K; Besson, D; Barbraud, C; Weimerskirch, H	1984	Annuals Zoologici Fennici, 21:321-338	Clarke et al 2010 - Methods in Ecology and Evolution 1:253-262 (GPDD)	PGLS + GLMM	Yes	D	f	c	Dfc	0	751	759.8	25	-14	37	15.5	94	20	150	-1.047	28	54	32	36	48	32	46	35	25	22	48	48	49	30	59	42	26
573	Aves	Passeriformes	Sylviidae	Luscinia	svecica	Bluethroat	65.96 N	16.16 E	Ammarnas, Vasterbotten	Sweden	6	Wright, LJ; Hoblyn, RA; Green, RE; Bowden, CGR	1984	Annuals Zoologici Fennici, 21:321-338	Clarke et al 2010 - Methods in Ecology and Evolution 1:253-262 (GPDD)	PGLS + GLMM	Yes	D	f	c	Dfc	0	751	759.8	25	-14	37	15.5	94	20	130	-0.844	4	4	4.5	4.5	20	10	7	6	10	5	21	7	12	13	17	10	8
576	Aves	Passeriformes	Fringillidae	Carduelis	flammea	Redpoll	65.96 N	16.16 E	Ammarnas, Vasterbotten	Sweden	6	Jedrzejewska, B, Jedrzejewski, W, Bunevich, AN, Milkowski, L & Krasinski, ZA	1984	Annuals Zoologici Fennici, 21:321-338	Clarke et al 2010 - Methods in Ecology and Evolution 1:253-262 (GPDD)	PGLS + GLMM	Yes	D	f	c	Dfc	0	751	759.8	25	-14	37	15.5	94	20	120	-1.106	4	13	6	8	15	82	8	14	79	14	25	22	22	21	40	2	20
742	Mammalia	Cetartiodactyla	Bovidae	Connochaetes	taurinus	Common wildebeest	3.166 S	35.583 E	Serengeti	Tanzania	7	Owen-Smith, N	1990	Oecologia, 82:283-288	Clarke et al 2010 - Methods in Ecology and Evolution 1:253-262 (GPDD)	PGLS + GLMM	Yes	C	w	b	Cwb	18.3	822	141	85	10.8	5	25.8	201	26	2400	-0.09	309743	356124	397624	439124	461208	483292	535663	588034	640406	692777	773014	906411	1039808	1173206	1306603	1440000	1248934
779	Aves	Passeriformes	Paridae	Parus	major	Great tit	51.78 N	1.34 W	Wytham Wood, Oxfordshire, England	UK	1	Smirnov, EN; Miquelle, DG	1980	Ardea, 68:133-142	Clarke et al 2010 - Methods in Ecology and Evolution 1:253-262 (GPDD)	PGLS + GLMM	Yes	C	f	b	Cfb	9.7	667	485.4	13	0.2	41	21.4	66	32	130	-0.645	13.999	41.9971	59.9959	61.9957	63.9956	39.9972	41.9971	61.9957	53.9963	49.9965	97.9932	55.9961	81.9943	101.993	171.988	85.9941	77.9946
815	Aves	Passeriformes	Cardinalidae	Spiza	americana	Dickcissel	34.016 N	100.66 W	Rolling Red Praries, Kansas	USA	No	Pañella, P; Herrero, J; Canut, J; García-Serrano, A	2012	USGS Patuxent Wildlife Research Center, Laurel, MD (http://www.mbr-pwrc.usgs.gov/bbs)	Clarke et al 2010 - Methods in Ecology and Evolution 1:253-262 (GPDD)	PGLS + GLMM	Yes	B	s	k	Bsk	16.3	544	834.4	51	-3.6	16	35.4	83	28	160	-0.756	53	83	102	56	35	30	88	78	77	52	62	58	60	63	52	100	99
827	Mammalia	Lagomorpha	Leporidae	Lepus	timidus	Mountain hare	59.833 N	30.0833 E	Gatchina, Leningradskaya Oblast	Russia	No	Krebs, CJ	1972	The Board of Trustees of the University of Illinois. Originally published as Ekologiya zhivotnykh by the Higher School State Publishers, Moscow, 1963.	Clarke et al 2010 - Methods in Ecology and Evolution 1:253-262 (GPDD)	PGLS + GLMM	Yes	B	s	k	Bsk	4.8	646	895.5	31	-10.2	30	22.2	80	25	610	-1.11	411	523	1643	859	597	784	2203	747	784	1008	411	1531	1232	2800	597	896	635
885	Aves	Columbiformes	Pteroclididae	Pterocles	namaqua	Namaqua sandgrouse	28.75 S	24.0833 E	Rooipoort, Kimberley, Northern Cape Province	South Africa	No	Reading, RP, Mix, H, Lhagvasuren, B & Tseveenmyadag, N	1996	Biological Conservation, 75:93-101	Clarke et al 2010 - Methods in Ecology and Evolution 1:253-262 (GPDD)	PGLS + GLMM	Yes	B	s	h	Bsh	18.6	380	543.1	72	1.2	6	34.2	75	86	280	-0.837	24.4	12.2	120	77.5	44.1	12.8	0.2	172.2	31.8	61.3	31.1	68.1	14.1	56.2	75.4	405.8	5.5
916	Mammalia	Eulipotyphla	Erinaceidae	Erinaceus	europaeus	Western European hedgehog	51.916 N	0.333 W	Hexton, Hertfordshire, England	UK	No	Wesolowski, T & Tomialojc, L	1968	Journal of Zoology, London 156:513-517	Clarke et al 2010 - Methods in Ecology and Evolution 1:253-262 (GPDD)	PGLS + GLMM	Yes	C	f	b	Dfb	9.7	655	505.8	10	0	42	22	64	23	248	-0.316	42	48	50	54	38	30	39	26	25	23	28	33	25	33	30	37	70
917	Mammalia	Carnivora	Mustelidae	Mustela	nivalis	Least weasel	51.916 N	0.333 W	Hexton, Hertfordshire, England	UK	No	Wesolowski, T & Tomialojc, L	1968	Journal of Zoology, London 156:513-517	Clarke et al 2010 - Methods in Ecology and Evolution 1:253-262 (GPDD)	PGLS + GLMM	No	C	f	b	Dfb	9.7	655	505.8	10	0	42	22	64	23	235	-0.89	40	26	16	26	12	24	40	18	16	15	24	19	12	32	90	30	30
925	Mammalia	Rodentia	Sciuridae	Tamias	minimus	Eastern (least) chipmunk	47.16 N	95.25 W	Itasca State Park, Minnesota	USA	8	Jedrzejewska, B, Jedrzejewski, W, Bunevich, AN, Milkowski, L & Krasinski, ZA	1984	Canadian Field Naturalist, 98:1-6	Clarke et al 2010 - Methods in Ecology and Evolution 1:253-262 (GPDD)	PGLS + GLMM	No	D	f	b	Dfb	3.3	669	1206	56	-22.1	14	26.1	109	21	200	-0.476	9.3	18.3	4.4	9.3	2.4	5.4	9.4	8.5	2.6	1.4	9.3	2.3	3.3	5.3	4.2	8.3	10.2
927	Mammalia	Rodentia	Sciuridae	Spermophilus	tridecemlineatus	Thirteen-line ground squirrel	47.16 N	95.25 W	Itasca State Park, Minnesota	USA	8	Heubeck, M	1984	Canadian Field Naturalist, 98:1-6	Clarke et al 2010 - Methods in Ecology and Evolution 1:253-262 (GPDD)	PGLS + GLMM	Yes	D	f	b	Dfb	3.3	669	1206	56	-22.1	14	26.1	109	21	240	-0.55	17.3	13.1	11.4	7.3	6.4	13.4	17.4	20.5	10.4	10.4	8.2	7.3	8.3	24.1	9.1	36.3	17
928	Mammalia	Rodentia	Cricetidae	Arvicola	amphibius	European water vole	47.216 N	7.53 E	Solothurn	Switzerland	No	Korner, M	1993	Jahrbusch fur Solothurnische Geschichte, 66:441-454	Clarke et al 2010 - Methods in Ecology and Evolution 1:253-262 (GPDD)	PGLS + GLMM	No	C	f	b	Dfb	8.2	1011	619.8	19	-2.9	65	22.2	119	106	265	-0.202	1998000	3399000	2275000	5097000	834000	770000	890000	1663000	1448000	2918000	5270000	6604000	8292000	7173000	5529000	5991000	5257000
939	Aves	Galliformes	Tetraonidae	Tetrao	tetrix	Black grouse	60.75 N	25.5 E	Etelä-Suomen Laani, Karelia	Finland	No	Erlien, D & Tester, J	1948	Papers in Game Research, 1:1-166	Clarke et al 2010 - Methods in Ecology and Evolution 1:253-262 (GPDD)	PGLS + GLMM	Yes	D	f	b	Dfb	4.2	646	845.5	30	-10.7	33	21	81	40	500	-0.707	2	7	21	26	25	14	14	29	20	22	45	38	100	51	36	18	43
954	Aves	Anseriformes	Anatidae	Branta	canadensis	Canada goose	49.86 N	116.85 W	Columbia River, British Columbia	Canada	No	Ito, Y	1980	Comparative Ecology, Cambridge University Press pp 143	Clarke et al 2010 - Methods in Ecology and Evolution 1:253-262 (GPDD)	PGLS + GLMM	Yes	D	f	c	Dfc	6.3	771	762.3	32	-7.8	45	25	106	21	890	-0.409	419.971	439.97	599.959	619.957	599.959	619.957	619.957	599.959	539.963	539.963	519.964	479.967	479.967	539.963	419.971	299.979	459.968
955	Mammalia	Cetartiodactyla	Bovidae	Ovis	canadensis	Bighorn sheep	44.76 N	110.55 W	Yellowstone National Park, Wyoming	USA	25	Morales, MB; Alonso, JC; Alonso, J	1980	Comparative Ecology, Cambridge University Press pp 143	Clarke et al 2010 - Methods in Ecology and Evolution 1:253-262 (GPDD)	PGLS + GLMM	Yes	D	f	c	Dfc	-1.6	679	828.3	15	-19.1	42	19.9	71	38	1687	-0.452	232	200	219	194	219	290	168	45	116	97	90	84	123	123	123	174	187
958	Mammalia	Cetartiodactyla	Cervidae	Dama	dama	Fallow deer	51.033 N	1.33 W	New Forest, Hampshire, England	UK	9	Nummi, P; Saari, L	1989	Symposyum of the Zoological Society of London, 58:167-179	Clarke et al 2010 - Methods in Ecology and Evolution 1:253-262 (GPDD)	PGLS + GLMM	Yes	C	f	b	Dfb	10.2	778	466.9	21	1	47	21.7	86	26	1715	-0.654	788	857	931	933	994	1147	1036	968	855	893	1022	866	1017	904	909	834	973
959	Mammalia	Cetartiodactyla	Cervidae	Cervus	nippon	Sika deer	51.033 N	1.33 W	New Forest, Hampshire, England	UK	9	Jedrzejewska, B, Jedrzejewski, W, Bunevich, AN, Milkowski, L & Krasinski, ZA	1989	Symposyum of the Zoological Society of London, 58:167-179	Clarke et al 2010 - Methods in Ecology and Evolution 1:253-262 (GPDD)	PGLS + GLMM	Yes	C	f	b	Dfb	10.2	778	466.9	21	1	47	21.7	86	26	1277	-0.267	35	44	34	42	64	84	97	67	38	38	37	71	73	75	78	88	94
962	Aves	Piciformes	Picidae	Dendrocopos	medius	Middle spotted Woodpecker	52.5 N	23.13 E	Bialowieza Primeval Forest, Bialystok	Poland	11	Putman, R J & Sharma, S K	1997	Ecography, 20:432-453	Clarke et al 2010 - Methods in Ecology and Evolution 1:253-262 (GPDD)	PGLS + GLMM	Yes	D	f	b	Dfb	7	563	809.6	34	-7.5	29	23.3	77	20	210	-0.637	25.7982	20.3986	23.5984	14.599	13.799	22.3985	24.1983	27.7981	23.1984	17.3988	14.799	19.5986	18.3987	20.5986	28.398	30.5979	28.1981
963	Aves	Passeriformes	Motacillidae	Anthus	trivialis	Tree pipit	52.5 N	23.13 E	Bialowieza Primeval Forest, Bialystok	Poland	11	Wesolowski, T & Tomialojc, L	1997	Ecography, 20:432-453	Clarke et al 2010 - Methods in Ecology and Evolution 1:253-262 (GPDD)	PGLS + GLMM	Yes	D	f	b	Dfb	7	563	809.6	34	-7.5	29	23.3	77	20	150	-0.387	41.5971	30.3979	23.9983	18.5987	23.1984	24.3983	28.998	26.9981	19.7986	16.7988	9.99931	11.5992	17.7988	11.7992	16.7988	7.1995	4.79967
964	Aves	Passeriformes	Sylviidae	Phylloscopus	sibilatrix	Wood warbler	52.5 N	23.13 E	Bialowieza Primeval Forest, Bialystok	Poland	11	Bechet, A; Johnson, AR	1997	Ecography, 20:432-453	Clarke et al 2010 - Methods in Ecology and Evolution 1:253-262 (GPDD)	PGLS + GLMM	Yes	D	f	b	Dfb	7	563	809.6	34	-7.5	29	23.3	77	20	125	-0.999	160.989	296.38	177.988	264.582	226.784	224.784	240.583	226.784	135.191	166.988	139.19	121.392	147.19	125.191	188.987	15.9989	186.987
965	Aves	Passeriformes	Muscicapidae	Muscicapa	striata	Spotted flycatcher	52.5 N	23.13 E	Bialowieza Primeval Forest, Bialystok	Poland	11	Chase, MK; Nur, N; Geupel, GR	1997	Ecography, 20:432-453	Clarke et al 2010 - Methods in Ecology and Evolution 1:253-262 (GPDD)	PGLS + GLMM	Yes	D	f	b	Dfb	7	563	809.6	34	-7.5	29	23.3	77	20	140	-0.614	18.3987	35.3976	27.1981	30.5979	30.9979	40.9972	32.3978	31.9978	48.1967	41.3971	39.7973	38.5973	40.7972	48.9966	39.9972	44.1969	40.3972
966	Aves	Passeriformes	Muscicapidae	Ficedula	parva	Red-breasted flycatcher	52.5 N	23.13 E	Bialowieza Primeval Forest, Bialystok	Poland	11	Stenning, MJ; Harvey, PH; Campbell, B	1997	Ecography, 20:432-453	Clarke et al 2010 - Methods in Ecology and Evolution 1:253-262 (GPDD)	PGLS + GLMM	Yes	D	f	b	Dfb	7	563	809.6	34	-7.5	29	23.3	77	20	115	-0.625	14.199	16.3989	18.9987	17.7988	21.5985	17.9988	19.1987	22.9984	21.3985	19.9986	20.7986	29.7979	22.7984	26.9981	19.7986	11.9992	23.5984
967	Aves	Passeriformes	Muscicapidae	Ficedula	hypoleuca	Pied flycatcher	52.5 N	23.13 E	Bialowieza Primeval Forest, Bialystok	Poland	11	Nielsen, OK & Petursson, G	1997	Ecography, 20:432-453	Clarke et al 2010 - Methods in Ecology and Evolution 1:253-262 (GPDD)	PGLS + GLMM	Yes	D	f	b	Dfb	7	563	809.6	34	-7.5	29	23.3	77	20	130	-0.33	16.1989	22.9984	17.9988	12.9991	11.3992	24.1983	20.3986	19.7986	34.5976	29.198	31.1978	30.9979	25.5982	25.9982	28.998	28.798	30.9979
968	Aves	Passeriformes	Reguliidae	Regulus	regulus	Goldcrest	52.5 N	23.13 E	Bialowieza Primeval Forest, Bialystok	Poland	11	Little, RM, Crowe, TM & Villacastin-Herrero, CA	1997	Ecography, 20:432-453	Clarke et al 2010 - Methods in Ecology and Evolution 1:253-262 (GPDD)	PGLS + GLMM	Yes	D	f	b	Dfb	7	563	809.6	34	-7.5	29	23.3	77	20	90	-0.553	98.7932	87.9939	64.9955	48.5966	42.5971	75.5948	72.195	58.596	101.793	71.1951	40.5972	39.9972	37.9974	78.5946	114.992	138.99	63.1956
969	Aves	Passeriformes	Fringillidae	Coccothraustes	coccothraustes	Hawfinch	52.5 N	23.13 E	Bialowieza Primeval Forest, Bialystok	Poland	11	Southern, HN	1997	Ecography, 20:432-453	Clarke et al 2010 - Methods in Ecology and Evolution 1:253-262 (GPDD)	PGLS + GLMM	Yes	D	f	b	Dfb	7	563	809.6	34	-7.5	29	23.3	77	20	150	-0.711	89.9938	93.5935	90.1938	74.1949	102.393	63.1956	59.7959	100.593	85.3941	76.3947	63.7956	65.3955	101.993	120.992	77.5946	141.79	104.593
971	Mammalia	Cetartiodactyla	Bovidae	Procapra	gutturosa	Mongolian gazelle	48.13 N	114.9 E	Dornod Aimag	Mongolia	12	Kendeigh, SC	1998	Journal of Wildlife management, 62:59-71	Clarke et al 2010 - Methods in Ecology and Evolution 1:253-262 (GPDD)	PGLS + GLMM	No	B	s	k	Bsk	1.3	165	1422.9	101	-25.1	2	26.8	42	62	1285	-0.167	13613	19697	44137	53000	51382	50885	25447	57452	41567	41797	43438	59715	39819	36955	53438	61747	63568
972	Mammalia	Rodentia	Sciuridae	Marmota	sibirica	Siberian marmot	48.13 N	114.9 E	Dornod Aimag	Mongolia	12	Elton, C	1998	Journal of Wildlife management, 62:59-71	Clarke et al 2010 - Methods in Ecology and Evolution 1:253-262 (GPDD)	PGLS + GLMM	Yes	B	s	k	Bsk	1.3	165	1422.9	101	-25.1	2	26.8	42	34	700	-0.193	74800	72300	44800	67000	78000	76699	75497	72664	95672	73631	84454	51809	46976	54440	53892	58025	54130
974	Mammalia	Lagomorpha	Leporidae	Lepus	tolai	Tolai rabbit	48.13 N	114.9 E	Dornod Aimag	Mongolia	12	Naumov, NP	1998	Journal of Wildlife management, 62:59-71	Clarke et al 2010 - Methods in Ecology and Evolution 1:253-262 (GPDD)	PGLS + GLMM	Yes	B	s	k	Bsk	1.3	165	1422.9	101	-25.1	2	26.8	42	26	450	-0.749	1671	1229	365	602	738	954	962	1230	1027	621	992	1000	1016	1000	1061	1084	1093
975	Mammalia	Carnivora	Mustelidae	Mustela	eversmannii	Siberian polecat	48.13 N	114.9 E	Dornod Aimag	Mongolia	12	Pistorius, PA; Taylor, FE; Bester, MN; Hofmeyr, GJG & Kirkman, SP	1998	Journal of Wildlife management, 62:59-71	Clarke et al 2010 - Methods in Ecology and Evolution 1:253-262 (GPDD)	PGLS + GLMM	Yes	B	s	k	Bsk	1.3	165	1422.9	101	-25.1	2	26.8	42	26	555	-0.649	317	250	248	300	495	539	620	416	371	314	307	351	314	300	326	313	504
976	Aves	Anseriformes	Anatidae	Branta	bernicla	Brant goose or Brent goose	41.66 N	69.95 W	Chatham, Massachusetts	USA	No	Phillips, J	1932	The Auk 49:445-453	Clarke et al 2010 - Methods in Ecology and Evolution 1:253-262 (GPDD)	PGLS + GLMM	Yes	C	f	a	Cfa	9.5	1122	745.1	12	-4.8	74	23.7	113	47	640	-0.741	210	290	72	135	715	409	297	368	410	594	296	208	218	541	179	152	102
979	Mammalia	Cetartiodactyla	Cervidae	Alces	alces	Moose (Elk)	47.9 N	91.86 W	Boundary Waters Canoe Area, Minnesota	USA	No	Peek, J, Urich, D & Maekie, R	1976	Wildlife Monographs, 48:6-65	Clarke et al 2010 - Methods in Ecology and Evolution 1:253-262 (GPDD)	PGLS + GLMM	No	D	f	b	Dfb	3.2	712	1187.3	50	-21.4	18	25.5	104	56	2800	-0.014	1600	1500	1450	1400	1400	1300	1100	1200	1000	800	850	950	1000	1050	1850	2200	2400
981	Aves	Falconiformes	Falconidae	Falco	rusticolus	Gyr falcon	64.983 N	19.083 W	Western Iceland	Iceland	No	Kauffman, MJ; Frick, WF; Linthicum, J	1995	Wildlife Biology, 1:2 p65-71	Clarke et al 2010 - Methods in Ecology and Evolution 1:253-262 (GPDD)	PGLS + GLMM	Yes	E	T	T	ET	-0.2	1184	427.1	16	-7.7	73	9.7	125	63	540	-0.209	87	93	104	99	106	88	77	64	44	70	92	100	157	190	144	104	43
982	Mammalia	Cetartiodactyla	Bovidae	Bison	bonasus	European bison (Wisent)	52.5 N	23.13 E	Bialowieza Primeval Forest, Bialystok	Poland	11	Jedrzejewska, B, Jedrzejewski, W, Bunevich, AN, Milkowski, L & Krasinski, ZA	1997	Acta Theriologica, 42:399-451	Clarke et al 2010 - Methods in Ecology and Evolution 1:253-262 (GPDD)	PGLS + GLMM	No	D	f	b	Dfb	7	563	809.6	34	-7.5	29	23.3	77	118	2755	-0.03	483	497	546	504	528	508	477	515	572	NA	653	690	NA	711	772	657	770
983	Mammalia	Cetartiodactyla	Cervidae	Cervus	elaphus	Red deer (Wapiti)	52.5 N	23.13 E	Bialowieza Primeval Forest, Bialystok	Poland	11	Coulson, T; Guinness, F; Pemberton, J; Clutton-Brock, T	1997	Acta Theriologica, 42:399-451	Clarke et al 2010 - Methods in Ecology and Evolution 1:253-262 (GPDD)	PGLS + GLMM	Yes	D	f	b	Dfb	7	563	809.6	34	-7.5	29	23.3	77	48	2335	-0.074	1270	1232	1298	1388	1210	1971	2135	1753	1771	1971	1807	1313	1791	2139	2419	2820	3138
984	Mammalia	Cetartiodactyla	Cervidae	Capreolus	capreolus	Roe deer	52.5 N	23.13 E	Bialowieza Primeval Forest, Bialystok	Poland	11	Vucetich, L	1997	Acta Theriologica, 42:399-451	Clarke et al 2010 - Methods in Ecology and Evolution 1:253-262 (GPDD)	PGLS + GLMM	Yes	D	f	b	Dfb	7	563	809.6	34	-7.5	29	23.3	77	48	1260	-0.222	1600	1443	1046	1389	1988	2555	2555	2114	2240	1610	1389	916	749	1625	1956	2272	2574
985	Mammalia	Cetartiodactyla	Suidae	Sus	scrofa	Wild boar	52.5 N	23.13 E	Bialowieza Primeval Forest, Bialystok	Poland	11	Hipkiss, T; Stefansson, O; Hornfeldt, B	1997	Acta Theriologica, 42:399-451	Clarke et al 2010 - Methods in Ecology and Evolution 1:253-262 (GPDD)	PGLS + GLMM	Yes	D	f	b	Dfb	7	563	809.6	34	-7.5	29	23.3	77	48	1150	-0.179	1174	841	1096	1405	1483	1102	2036	1649	949	838	817	690	1217	1443	2364	2494	2345
1060	Aves	Charadriiformes	Charadriidae	Charadrius	hiaticula	Ringed plover	55.66 N	1.783 W	Farne Islands, Northumberland, England	UK	5	Putman, R J & Sharma, S K	1977	Science 197:266-270	Clarke et al 2010 - Methods in Ecology and Evolution 1:253-262 (GPDD)	PGLS + GLMM	Yes	C	f	b	Cfb	8.6	687	405.2	15	0.2	46	18.7	73	29	190	-0.527	12	12	12	11	10	17	22	19	15	15	12	16	11	11	13	21	12
1080	Mammalia	Carnivora	Felidae	Acinonyx	jubatus	Cheetah	3.16 S	35.583 E	Serengeti	Tanzania	7	Kelly, MJ, Laurenson, MK, Fitzgibbon, CD, Collins, DA, Durant, SM, Frame, GW, Bertram, BCR, Caro, TM	1998	Journal of Zoology 244:473-488	Clarke et al 2010 - Methods in Ecology and Evolution 1:253-262 (GPDD)	PGLS + GLMM	Yes	C	w	b	Cwb	18.3	822	141	85	10.8	5	25.8	201	26	2010	-0.158	7	9	10	9	12	19	30	33	36	25	16	18	27	41	42	42	56
1081	Mammalia	Cetartiodactyla	Bovidae	Bos	taurus	Chillingham cattle	55.516 N	1.9 W	Chillingham, Northumberland, England	UK	No	Diamond, JM; May, RM	1977	Science 197:266-270	Clarke et al 2010 - Methods in Ecology and Evolution 1:253-262 (GPDD)	PGLS + GLMM	Yes	C	f	b	Cfb	8	747	413.5	15	-0.4	50	18.2	77	33	2700	-0.103	15	16	14	16	18	22	25	27	26	26	29	30	33	36	36	38	38
1082	Mammalia	Carnivora	Canidae	Vulpes	vulpes fulva	Coloured fox	53.893 N	62.25 W	Labrador	Canada	No	Bonacic, C; Macdonald, DW; Galaz, J; Sibly, RM	1942	Voles, mice and lemmings. Oxford University Press.	Clarke et al 2010 - Methods in Ecology and Evolution 1:253-262 (GPDD)	PGLS + GLMM	Yes	D	f	c	Dfc	-4	958	1136.7	20	-26.2	60	17.6	112	92	1100	-0.961	276	406	105	205	276	405	74	699	1495	312	675	101	159	744	80	150	257
1084	Mammalia	Cetartiodactyla	Cervidae	Odocoileus	virginianus	White-tailed deer	42.26 N	83.73 W	George reserve, Ann Arbor, Michigan	USA	No	Gilbert, BA; Raedeke, KJ	1979	The George Reserve Deer Herd. Ann Arbor, MI: The University Michigan Press.	Clarke et al 2010 - Methods in Ecology and Evolution 1:253-262 (GPDD)	PGLS + GLMM	Yes	D	f	a	Dfa	8.8	819	959	19	-9.4	44	28	86	43	1625	-0.381	16	30	50	80	140	160	220	155	215	170	145	140	143	130	130	120	110
1087	Mammalia	Carnivora	Felidae	Panthera	leo	Lion	3.16 S	35.55 E	Ngorongoro Crater	Tanzania	No	Ito, Y	1991	Conservation Biology, 5:219-230	Clarke et al 2010 - Methods in Ecology and Evolution 1:253-262 (GPDD)	PGLS + GLMM	Yes	C	w	b	Cwb	18.3	822	141	85	10.8	5	25.8	201	30	2650	-0.247	13	12	31	25	39	46	60	61	53	69	99	104	62	87	98	94	123
1088	Mammalia	Carnivora	Felidae	Lynx	canadensis	Lynx	49.45 N	123.55 W	Northern Hudson Bay	Canada	No	Enemar, A, Nilsson, L & Sjostrand, B	1942	Voles, mice and lemmings. Oxford University Press.	Clarke et al 2010 - Methods in Ecology and Evolution 1:253-262 (GPDD)	PGLS + GLMM	Yes	C	f	b	Cfb	6.9	1351	551.1	54	-3.3	40	20.6	216	113	870	-0.198	4849	3131	3130	2701	2610	5076	7527	16640	24103	22782	9422	4619	3116	3894	6311	18941	34744
1096	Mammalia	Carnivora	Ursidae	Ursus	arctos	Yellowstone Grizzly bear	44.76 N	110.53 W	Yellowstone National Park, Wyoming	USA	25	Murphy, MT	-	M Boyce, pers. comm.	Clarke et al 2010 - Methods in Ecology and Evolution 1:253-262 (GPDD)	PGLS + GLMM	No	D	f	c	Dfc	-1.6	673	827.3	14	-19	42	20	70	39	1938	-0.051	153	186	160	172	168	161	168	164	168	146	142	142	153	142	150	146	121
1104	Mammalia	Carnivora	Otariidae	Eumetopias	jubatus	Steller Sea Lion	54.116 N	165.96 W	Akutan (Cape Morgan), Alaska	USA	No	Beven, G	2002	Steller Sea Lion Adult Count Database (www.afsc.noaa.gov/nmml/alaska/sslhome/databases)	Clarke et al 2010 - Methods in Ecology and Evolution 1:253-262 (GPDD)	PGLS + GLMM	No	E	T	T	ET	2.5	951	423.9	26	-5.5	52	12.2	110	46	2600	-1.041	3585	3145	2967	2796	47	NA	NA	NA	NA	2084	1269	1338	2	NA	578	765	818
1124	Aves	Aves	Anatidae	Aythya	fuligula	Tufted duck	56.86 N	24.6 E	Engure Marsh	Latvia	No	Lande, R, Engen, S, Saether, B-E, Filli, F, Matthysen, E, & Weimerskirch, H	2002	The American Naturalist, 159, 321-337	Clarke et al 2010 - Methods in Ecology and Evolution 1:253-262 (GPDD)	PGLS + GLMM	Yes	D	f	b	Dfb	6	644	810.2	30	-8.1	27	21.2	76	36	440	-0.584	30	36	59	81	78	48	88	99	64	79	80	86	61	46	61	61	56
1127	Aves	Anseriformes	Anatidae	Cygnus	olor	Mute Swan	51.583 N	0.616 W	Thames River, England	UK	No	Williamson, MH	2002	The American Naturalist, 159, 321-337	Clarke et al 2010 - Methods in Ecology and Evolution 1:253-262 (GPDD)	PGLS + GLMM	Yes	C	f	b	Cfb	9.9	667	518.3	12	-0.1	40	22.5	65	117	1400	-0.068	185	173	173	192	209	217	237	259	271	286	286	297	311	303	341	364	333
1129	Mammalia	Carnivora	Felidae	Panthera	tigris	Amur tiger	46.016 N	136.5 E	Sikhote-Alin State Biosphere Zapodevnik, Primorski Krai	Russia	No	Bretagnolle, V; Mougeot, F; Thibault, JC	1999	Riding the Tiger (J. Seidensticker, S. Christie, and P. Jackson, eds.), pp. 71-99. Cambridge University Press	Clarke et al 2010 - Methods in Ecology and Evolution 1:253-262 (GPDD)	PGLS + GLMM	Yes	D	f	c	Dfc	-1.6	975	1136.1	63	-23.4	20	18.3	173	28	2875	-0.171	3.5	6.5	7	8.5	8.5	7	7.5	12	11	12.5	12.5	15	16.5	14.5	17.5	18.5	18
1169	Mammalia	Rodentia	Muridae	Peromyscus	maniculatus	Deer mouse	43.46 N	80.66 W	Algonquin Provincial Park, Ontario	Canada	23	Kendeigh, SC	1998	Ecology, 79: 213-225	Clarke et al 2010 - Methods in Ecology and Evolution 1:253-262 (GPDD)	PGLS + GLMM	Yes	D	f	b	Dfb	6.4	951	942.6	11	-11.1	61	25.6	94	44	173	-1.021	124.242	247.273	376.515	110.606	78.0303	165.909	55.303	155.303	143.046	279.365	73.3002	115.873	55.5556	146.349	82.8571	125.397	203.81
1170	Mammalia	Rodentia	Muridae	Myodes	gapperi	Southern red-backed vole	43.46 N	80.66 W	Algonquin Provincial Park, Ontario	Canada	23	Pandolfi, M; Tanferna, A	1998	Ecology, 79: 213-225	Clarke et al 2010 - Methods in Ecology and Evolution 1:253-262 (GPDD)	PGLS + GLMM	Yes	D	f	b	Dfb	6.4	951	942.6	11	-11.1	61	25.6	94	44	140	-0.543	17.1717	10.9091	29.5455	46.9697	31.0606	22.7273	14.3939	52.2727	18.9845	20.2381	9.61857	1.5873	8.57143	24.127	6.98413	6.03175	21.2698
1171	Mammalia	Rodentia	Sciuridae	Tamias	striatus	Eastern chipmunk	43.46 N	80.66 W	Algonquin Provincial Park, Ontario	Canada	23	Beven, G	1998	Ecology, 79: 213-225	Clarke et al 2010 - Methods in Ecology and Evolution 1:253-262 (GPDD)	PGLS + GLMM	Yes	D	f	b	Dfb	6.4	951	942.6	11	-11.1	61	25.6	94	44	255	-0.625	1.0101	8.18182	25	3.78788	12.1212	21.2121	22.7273	30.303	29.5806	48.4127	21.5589	23.1746	3.1746	6.98413	16.5079	8.25397	11.1111
1195	Mammalia	Cetartiodactyla	Cervidae	Odocoileus	hemionus	Black-tailed deer (Mule deer)	42.23 N	121.76 W	Winema National Forest, Oregon	USA	No	Jefferies, DJ & Pendlebury, J B	2003	Journal of Wildlife Management, 66:729-736	Clarke et al 2010 - Methods in Ecology and Evolution 1:253-262 (GPDD)	PGLS + GLMM	Yes	C	s	b	Csb	8	350	703.8	53	-6.6	6	28.9	60	26	1438	-0.14	72.7	87.9	86.5	76.1	65.1	47.6	51.4	30.2	34.2	33.6	17.1	14.2	16.4	28.1	28.7	33.3	24.8
1197	Aves	Passeriformes	Cinclidae	Cinclus	cinclus	Eurasian dipper	58.25 N	7.25 E	River Lygna	Norway	No	Kanyamibwa, S, Schierer, A, Pradel, R & Lebreton, JD	2000	Science, 287: 854-856	Clarke et al 2010 - Methods in Ecology and Evolution 1:253-262 (GPDD)	PGLS + GLMM	Yes	C	f	b	Cfb	5.6	1602	549.1	30	-3.9	78	16	193	20	170	-0.477	57	29	29	48	27	54	67	50	39	56	71	97	100	109	114	117	49
1200	Aves	Falconiformes	Accipitridae	Aquila	fasciatus	Bonelli's eagle	37.3 N	8.4 W	Beja, Faro & Setúbal Districts	Portugal	No	Beja, P; Palma, L	2008	Journal of Animal Ecology, 77:335-340	Herrando-Pérez et al. 2012 - Ecology 93:1728-1740	PGLS + GLMM	Yes	C	s	a	Csa	16.1	553	427.9	67	6.8	1	28.6	89	15	680	-0.451	8	16	16	16	16	20	22	22	24	24	22	22	26	28	30	NA	NA
1201	Mammalia	Cetartiodactyla	Camelidae	Vicugna	vicugna	Vicuña	19.0 S	69.5 W	Parinacota Province, Tarapaca	Chile	No	Boyce, M	2002	Oryx, 36:118-125	Herrando-Pérez et al. 2012 - Ecology 93:1728-1740	PGLS + GLMM	No	B	W	k	BWk	9.6	98	255.4	159	-3.1	0	20.4	44	18	1600	-0.141	1924	2634	3533	5331	5994	6845	8312	10584	12429	13896	15363	17161	18297	19290	21183	22461	18391
1202	Mammalia	Carnivora	Mustelidae	Meles	meles	Eurasian badger	51.8 N	1.3 W	Wytham Wood, Oxfordshire, England	UK	1	Reading, RP, Mix, H, Lhagvasuren, B & Tseveenmyadag, N	2009	Journal of Mammalogy, 90:1392-1403	Herrando-Pérez et al. 2012 - Ecology 93:1728-1740	PGLS + GLMM	Yes	C	f	b	Cfb	9.8	615	465.9	14	0.5	36	21.1	60	21	1140	-0.265	61	95	104	111	118	145	155	208	234	236	231	193	168	176	199	190	210
1203	Mammalia	Carnivora	Canidae	Lycaon	pictus	Wild dog	0.1 N	37.0 E	Laikipia, Samburu, Isiolo & Baringo Discricts	Kenya	No	Mallord, JW; Sutherland, WJ; Dolman, PM	2011	Journal of Mammalogy, 92:305-315	Herrando-Pérez et al. 2012 - Ecology 93:1728-1740	PGLS + GLMM	No	C	f	b	Cfb	17.1	744	56	50	7.5	22	27	129	10	1450	-0.217	52	80	90	150	194	187	272	284	295	308	NA	NA	NA	NA	NA	NA	NA
1204	Aves	Falconiformes	Accipitridae	Pandion	haliaetus	Osprey	42 N	9 E	Corsica	France	No	Coulson, T; Gaillard, JM; Festa-Bianchet, M	2008	Journal of Animal Ecology, 77:998-1007	Herrando-Pérez et al. 2012 - Ecology 93:1728-1740	PGLS + GLMM	Yes	C	s	b	Csb	11.3	767	521	42	2.5	15	22.7	103	31	660	-0.19	3	4	6	7	8	12	10	12	13	13	13	13	13	15	17	14	21
1209	Aves	Charadriiformes	Laridae	Rissa	tridactyla	Black-legged kittiwake	55.0 N	1.4 W	River Tyne, England	UK	No	Zino, F; Oliveira, P; King, S; Buckle, A; Biscoito, M; Costa Neves, H; Vasconcelos, A	1985	Journal of Animal Ecology, 54:9-26	Herrando-Pérez et al. 2012 - Ecology 93:1728-1740	PGLS + GLMM	Yes	C	f	b	Cfb	8.7	660	420.4	14	0.4	45	18.9	70	34	390	-0.192	4	11	12	13	17	21	31	34	35	38	44	52	61	70	83	88	104
1210	Aves	Procellariiformes	Diomedeidae	Diomedea	exulans	Wandering albatross	46.4 S	51.8 E	Possession Island, Crozet Archipelago, Southern Ocean	France	No	Sillett, TS; Holmes, RT	2008	Biological Conservation, 141:1840-1856	Herrando-Pérez et al. 2012 - Ecology 93:1728-1740	PGLS + GLMM	Yes	E	T	T	ET	5.5	2341	172.5	15	1.5	150	10.5	241	26	1350	-0.205	267	259	248	238	262	231	306	268	293	308	291	324	320	316	349	332	377
1216	Aves	Procellariiformes	Diomedeidae	Thalassarche	melanophrys	Black-browed albatross	54 S	38 W	Bird Island, South Georgia, Southern Ocean	UK	13	Siivonen, L	1994	Ibis, 136:50-71	Herrando-Pérez et al. 2012 - Ecology 93:1728-1740	PGLS + GLMM	Yes	E	T	T	ET	2	1456	251.2	17	-4.6	84	8.9	150	17	950	-0.744	230	229	253	210	141	118	147	183	187	173	183	179	51	158	155	125	90
1217	Aves	Procellariiformes	Diomedeidae	Thalassarche	chrysostoma	Grey-headed albatross	54 S	38 W	Bird Island, South Georgia, Southern Ocean	UK	13	Fryxell, JM, Falls, JB, Falls, AE, Brooks, RJ	1994	Ibis, 136:50-71	Herrando-Pérez et al. 2012 - Ecology 93:1728-1740	PGLS + GLMM	Yes	E	T	T	ET	2	1456	251.2	17	-4.6	84	8.9	150	17	810	-1.231	406	422	420	269	272	250	444	333	394	235	385	259	155	449	199	326	243
1219	Aves	Passeriformes	Sylviidae	Acrocephalus	sechellensis	Seychelles Warbler	4.3 S	55.7 E	Cousin Island, Indian Ocean	Seychelles	No	Brouwer, L; Tinbergen, JM; Both, C; Bristol, R; Richardson, DS; Komdeur, J	2009	Ecology, 90:729-741	Herrando-Pérez et al. 2012 - Ecology 93:1728-1740	PGLS + GLMM	Yes	A	f	-	Af	26.1	2165	60.6	48	23.5	66	29.7	365	20	140	-1.546	316	322	309	309	323	265	NA	335	275	342	300	316	284	313	341	296	302
1220	Mammalia	Rodentia	Sciuridae	Marmota	flaviventris	Yellow-bellied marmot	39 N	107 W	Picnic colony, East River Valley, Rocky Mountains, Colorado	USA	No	Woodroffe, R	2004	Ecology, 85:2446-2455	Herrando-Pérez et al. 2012 - Ecology 93:1728-1740	PGLS + GLMM	Yes	D	f	c	Dfc	-1	610	809.1	16	-20.3	34	19	61	39	720	-0.531	16	16	13	23	26	23	25	29	17	15	17	15	17	18	17	18	19
1221	Aves	Anseriformes	Anatidae	Chen	caerulescens	Greater snow goose	47 N	70.9 W	St Lawrence Estuary	Canada	No	Diamond, JM; May, RM	2007	Greater Snow Goose Working Group. Evaluation of the special conservation measures for Greater Snow Goose: Report of the Greater Snow Goose Working Group. Sainte-Foy, Québec: Canadian Wildlife Service, Quebec Region.	Herrando-Pérez et al. 2012 - Ecology 93:1728-1740	PGLS + GLMM	No	D	f	b	Dfb	4.4	1066	1066.7	18	-16.1	67	25	114	37	790	-0.005	143000	165000	153800	165600	160000	192600	170100	180000	170800	163000	185000	225400	260000	303500	255000	NA	363200
1223	Mammalia	Cetartiodactyla	Bovidae	Ovis	aries	Soay sheep	57.8 N	8.6 W	Kilda Archipelago, Scotland	Scotland	No	Williamson, MH	2005	Journal of Animal Ecology, 74:789-801	Herrando-Pérez et al. 2012 - Ecology 93:1728-1740	PGLS + GLMM	Yes	C	f	b	Cfb	7.6	1332	330.9	25	1.1	72	14.9	152	23	1800	-0.925	509	211	331	457	211	290	414	321	443	435	357	575	542	591	325	461	651
1224	Mammalia	Cetartiodactyla	Cervidae	Cervus	elaphus	Red deer (Wapiti)	57.0 N	6.3 W	Isle of Rum, Scotland	UK	No	Howell, JA; Brooks, GC; Semenoff-Irving, M; Greene, C	2004	Ecology, 85:411-422	Herrando-Pérez et al. 2012 - Ecology 93:1728-1740	GLMM	Yes	C	f	b	Cfb	6.7	1821	372.9	29	-0.5	89	15.1	221	34	2490	-0.502	209	211	225	243	275	312	278	290	263	253	245	260	313	272	294	333	260
1225	Aves	Falconiformes	Accipitridae	Circus	pygargus	Montagu's Harrier	43.7 N	0.2 E	Marche, Apennines	Italy	No	Millon, A; Bretagnolle, V	2009	Journal of Raptor Research, 43:155-159	Herrando-Pérez et al. 2012 - Ecology 93:1728-1740	PGLS + GLMM	Yes	C	f	b	Cfb	12.1	837	541.9	12	0.4	51	25.6	87	19	450	-0.315	6	8	22	26	10	17	16	18	31	12	8	10	13	12	13	6	6
1234	Aves	Anseriformes	Anatidae	Anas	penelope	Eurasian wigeon	65.6 N	17 W	Lake Myvatn	Iceland	16	Poysa, H; Pesonen, M	2003	Oikos, 102:358-366	Herrando-Pérez et al. 2012 - Ecology 93:1728-1740	PGLS + GLMM	Yes	E	T	T	ET	1.9	879	408.4	22	-5.7	45	11.5	101	21	480	-0.242	531	526	550	650	919	1095	1493	1623	1887	1292	1139	1001	1280	1488	905	883	880
1236	Mammalia	Cetartiodactyla	Bovidae	Bison	bison	American bison	58.9 N	112.9 W	Delta population, Wood Buffalo National Park	Canada	No	Bradley, M; Wilmshurst, J	2005	Canadian Journal of Zoology, 83:1195-1205	Herrando-Pérez et al. 2012 - Ecology 93:1728-1740	PGLS + GLMM	Yes	D	f	c	Dfc	-1.8	377	1395.4	47	-29.1	15	22.6	63	36	4000	-0.708	7021	3529	4335	3469	71	3865	3617	3797	3161	3685	3179	3872	NA	2742	3288	2306	1860
1237	Aves	Galliformes	Phasianidae	Perdix	perdix	Grey partridge	48.55 N	1.2 W	Plateau Aigre	France	No	Perrins, CM & Geer, TA	2003	Wildlife Biology, 9:93-102	Herrando-Pérez et al. 2012 - Ecology 93:1728-1740	PGLS + GLMM	Yes	C	f	b	Cfb	10.7	763	463.4	18	1.8	48	22.1	87	12	300	-0.811	18	30	53	32	46	42.5	48	50	52	25.8	29	33	NA	NA	NA	NA	NA
1239	Mammalia	Carnivora	Canidae	Canis	lupus	Grey wolf	48 N	88.8 W	Isle Royale, Michigan	USA	17	Botsford, LW, Wainwright, TC, Smith JT, Mastrup, S & Lott, DF	2009	www.isleroyalewolf.org	Herrando-Pérez et al. 2012 - Ecology 93:1728-1740	PGLS + GLMM	Yes	D	f	b	Dfb	3.2	754	1069.8	25	-18.8	35	24.2	84	50	2100	-0.264	20	22	22	23	20	26	28	26	22	22	17	18	20	23	24	31	41
1240	Mammalia	Cetartiodactyla	Cervidae	Alces	alces	Moose (Elk)	48 N	88.8 W	Isle Royale, Michigan	USA	17	Vucetich, L	2009	www.isleroyalewolf.org	Herrando-Pérez et al. 2012 - Ecology 93:1728-1740	GLMM	Yes	D	f	b	Dfb	3.2	754	1069.8	25	-18.8	35	24.2	84	50	2800	-0.171	563	610	628	639	663	707	733	765	912	1042	1268	1295	1439	1493	1435	1467	1355
1242	Aves	Charadriiformes	Laridae	Anous	stolidus	Common noddy	31 S	116 E	Lancelin Island, Western Australia	Australia	No	Dunlop, JN	2005	Emu, 105:99-104	Herrando-Pérez et al. 2012 - Ecology 93:1728-1740	PGLS + GLMM	No	C	s	a	Csa	18.1	567	471.2	80	7.1	10	33.1	115	10	410	-0.407	36	127	550	1288	1815	1089	1711	1603	1802	1856	NA	NA	NA	NA	NA	NA	NA
1243	Aves	Anseriformes	Anatidae	Anas	platyrhynchos	Mallard	59.3 N	16.8 E	Nasen Lake	Sweden	No	Elmberg, J	2003	Wildlife Biology, 9:67-73	Herrando-Pérez et al. 2012 - Ecology 93:1728-1740	PGLS + GLMM	No	D	f	b	Dfb	6.2	566	730.8	29	-6.6	27	21.7	70	12	580	-0.377	15	32	33	52	24	24	39	14	12	7	6	15	12	NA	NA	NA	NA
1244	Aves	Falconiformes	Accipitridae	Aquila	adalberti	Spanish imperial eagle	37 N	6.5 W	Doñana National Park, Huelva	Spain	18	Ferrer, M; Penteriani, V	2008	Journal of Applied Ecology, 45:1453-1459	Herrando-Pérez et al. 2012 - Ecology 93:1728-1740	PGLS + GLMM	No	C	s	a	Csa	17.9	525	498.8	65	7.3	1	30.3	81	39	770	-0.116	9.98415	9.98472	11.9795	11.98	12.9979	12.9985	15.0135	14.9937	15.0146	14.9948	14.9954	14.9959	16.0139	14.997	16.0149	14.998	15.0189
1246	Aves	Passeriformes	Hirundinidae	Hirundo	rustica	Barn Swallow	57.2 N	10 E	Kraghede	Denmark	No	Casado, E; Suárez-Seoane, Sñ Lamelin, J; Ferrer, M	2001	Journal of Applied Ecology, 38:378-389	Herrando-Pérez et al. 2012 - Ecology 93:1728-1740	PGLS + GLMM	Yes	C	f	b	Cfb	7.5	641	595.9	25	-3.4	31	19.7	72	39	160	-0.061	1284.59	970	1179.73	1310.81	786.486	1101.08	1835.17	1074.89	629.203	524.336	681.64	734.07	633.32	546.96	546.96	520.28	492.89
1249	Mammalia	Cetartiodactyla	Bovidae	Connochaetes	taurinus	Common wildebeest	24 S	31.5 E	Kruger National Park	South Africa	19	Wesolowski, T & Tomialojc, L	2006	Ecological Monographs, 76:93-109	Herrando-Pérez et al. 2012 - Ecology 93:1728-1740	GLMM	Yes	B	s	h	Bsh	22.7	502	360.6	79	8.5	5	33.4	92	13	2400	-0.159	0.519161	0.516967	0.57799	0.680283	0.765624	0.790119	0.814059	0.875359	0.943395	0.982774	0.978738	0.972507	0.982547	1.00798	1.04589	1.02957	0.913953
1250	Mammalia	Cetartiodactyla	Cervidae	Cervus	elaphus canadensis	Tule elk	38.1 N	122.9 W	Point Reyes National Seashore, California	USA	20	Beven, G	2002	Journal of Wildlife Management, 66:478-490	Herrando-Pérez et al. 2012 - Ecology 93:1728-1740	GLMM	No	C	s	b	Csb	12.8	1028	299.1	90	3.8	2	23.5	218	19	2000	-0.028	15	18	24	32	41	55	70	82	98	112	138	171	185	214	241	280	370
1251	Aves	Passeriformes	Fringillidae	Fringilla	montifringilla	Brambling	66 N	16 E	Lake Tjulträsk	Sweden	No	Wesolowski, T & Tomialojc, L	2005	Oikos, 110:155-163	Herrando-Pérez et al. 2012 - Ecology 93:1728-1740	PGLS + GLMM	Yes	D	f	c	Dfc	-0.7	796	747.4	24	-14.4	39	14.6	99	19	140	-0.742	112.3	103.5	100.3	76	86.6	110.3	63	55.4	79.5	126.2	101.5	80.6	61.9	70.6	73.7	76.1	45.1
1252	Mammalia	Diprotodontia	Burramyidae	Burramys	parvus	Mountain pigmy possum	36.3 S	148.6 E	Blue Cow, Snowy Mountains, New South Wales	Australia	No	McCarthy, MA; Broome, LS	2000	Journal of Animal Ecology , 69:599-607	Herrando-Pérez et al. 2012 - Ecology 93:1728-1740	PGLS + GLMM	Yes	C	f	b	Cfb	9.5	1024	484	15	-2.6	61	23.7	110	12	250	-1.188	31.8553	27.874	28.8783	38.8569	19.8469	23.8426	21.7842	34.8255	19.8041	35.7656	33.7785	39.7685	NA	NA	NA	NA	NA
1254	Aves	Passeriformes	Parulidae	Dendroica	caerulescens	Black-throated blue warbler	43.9 N	71.7 W	New Hampshire	USA	No	Wesolowski, T & Tomialojc, L	2005	In: Greenberg R, Marra PP, eds. Birds of two worlds: the Ecology and evolution of temperate-tropical migration. Baltimore: Johns Hopkins University Press, pp. 426-436	Herrando-Pérez et al. 2012 - Ecology 93:1728-1740	PGLS + GLMM	Yes	D	f	b	Dfb	5.8	1053	975.2	13	-15.2	69	26.5	102	14	900	-0.775	21	22	17	25.5	28.5	23	30	28.5	17.5	23.5	19	17	17	22.5	NA	NA	NA
1255	Aves	Passeriformes	Emberizidae	Melospiza	melodia	Song sparrow	38.1 N	122.9 W	Palomarin Study Area, Point Reyes National Reserve, California	USA	20	Kendeigh, SC	2005	The Auk, 122:571-592	Herrando-Pérez et al. 2012 - Ecology 93:1728-1740	PGLS + GLMM	Yes	C	s	b	Csb	12.8	1028	299.1	90	3.8	2	23.5	218	21	160	-0.354	35.2	47.71	39.21	54.22	57.22	52.22	NA	NA	45.97	48.2	49.97	38.74	35.74	35.98	37.23	30.93	32.22
1257	Aves	Charadriiformes	Laridae	Larus	audouinii	Audouin's gull	40.55 N	0.65 E	Ebro River Delta	Spain	No	P. Tryjanowski · T.H. Sparks	2006	Proceedings of the Royal Society B-Biological Sciences, 273:379-383	Herrando-Pérez et al. 2012 - Ecology 93:1728-1740	PGLS + GLMM	Yes	C	s	a	Csa	17.1	541	518.6	42	5.8	13	29.4	85	17	500	-0.252	2862	4258	4320	3936	6727	9400	10143	10353	11364	11752	11694	10242	10571	11700	10159	10369	9184
1258	Aves	Passeriformes	Muscicapidae	Ficedula	hypoleuca	Pied flycatcher	51.7 N	2.7 W	Forest of Dean, Gloucestershire, England	UK	No	Wesolowski, T & Tomialojc, L	1988	Journal of Animal Ecology, 57:307-317	Herrando-Pérez et al. 2012 - Ecology 93:1728-1740	GLMM	Yes	C	f	b	Cfb	9.4	883	460	17	0.9	56	20.5	96	17	130	-0.312	510	521	663	676	692	609	632	483	454	398	577	506	416	386	445	441	426
1262	Mammalia	Carnivora	Canidae	Urocyon	littoralis	Island fox	32.9 N	118.5 W	Tdams grid, San Clemente Island, California	USA	No	Enemar, A, Nilsson, L & Sjostrand, B	2007	Conservation Biology, 21:1082-1091	Herrando-Pérez et al. 2012 - Ecology 93:1728-1740	PGLS + GLMM	No	C	s	b	Csb	15.3	224	231.9	95	9.4	0	21.7	48	10	790	-1.112	4	4.4	6.2	4.6	4.6	4.8	4.4	5.5	5.1	5.1	NA	NA	NA	NA	NA	NA	NA
1264	Aves	Anseriformes	Anatidae	Cygnus	olor	Mute swan	60.3 N	22.0 E	Aasla Island	Finland	No	Lande, R, Engen, S, Saether, B-E, Filli, F, Matthysen, E, & Weimerskirch, H	2003	Journal of Avian Biology, 34:105-111	Herrando-Pérez et al. 2012 - Ecology 93:1728-1740	GLMM	Yes	D	f	b	Dfb	5.1	652	785.7	27	-8.7	33	21.3	75	34	1520	-0.178	1	1	1	1	2	2	1	3	3	2	3	4	5	5	7	6	13
1266	Mammalia	Cetartiodactyla	Cervidae	Alces	alces	Moose (Elk)	62.0 N	146.8 W	Nelchina, Alaska	USA	No	Testa, JW	2004	Ecology, 85:1453-1459	Herrando-Pérez et al. 2012 - Ecology 93:1728-1740	GLMM	Yes	D	f	c	Dfc	-4.2	393	1159.6	48	-26	13	18.6	64	21	2800	-0.306	0.76	0.65	0.79	0.83	0.79	0.73	0.68	1.05	0.79	0.68	0.79	0.66	0.85	0.71	0.63	0.54	0.54
1270	Aves	Procellariiformes	Procellariidae	Pterodroma	madeira	Zino's petrel	32.7 N	16.9 W	Central Mountain Massif, Madeira Island	Portugal	No	Williamson, MH	2001	Oryx, 35:128-136	Herrando-Pérez et al. 2012 - Ecology 93:1728-1740	PGLS + GLMM	Yes	C	s	b	Csb	14.3	704	277.8	66	8.3	6	22.2	112	15	340	-0.307	6	12	12	9	8	7	12	12	13	8	10	20	19	23	29	NA	NA
1271	Aves	Falconiformes	Accipitridae	Haliaeetus	albicilla	White-tailed eagle	57.3 N	6.2 W	Western Scotland	UK	No	Williamson, MH	2009	Ibis, 151:244-254	Herrando-Pérez et al. 2012 - Ecology 93:1728-1740	PGLS + GLMM	Yes	C	f	b	Cfb	7.8	1659	369.7	30	0.5	81	16.1	206	28	800	-0.173	1	3	5	7	7	9	9	9	9	9	8	8	10	11	12	14	19
1272	Aves	Falconiformes	Accipitridae	Hieraaetus	pennata	Booted eagle	37 N	6.5 W	Doñana National Park, Huelva	Spain	18	Evans, RJ; Wilson, JD; Amar, A; Douse, A; MacLennan, A; Ratcliffe, N; Whitfield, DP	2008	Ibis, 150:788-798	Herrando-Pérez et al. 2012 - Ecology 93:1728-1740	PGLS + GLMM	No	C	s	a	Csa	17.9	525	498.8	65	7.3	1	30.3	81	26	490	-0.116	1	1	2	2	4	5	3	13	17	21	18	12	12	18	20	24	36
1273	Mammalia	Carnivora	Phocidae	Mirounga	leonina	Soutern elephant seal	46.9 S	37.8 E	Marion Island, Prince Edward Archipelago, Indian Ocean	South Africa	No	Macdonald, DW; Newman, C; Nouvellet, M; Buesching, CD	2008	African Zoology 43:75-80	Herrando-Pérez et al. 2012 - Ecology 93:1728-1740	PGLS + GLMM	Yes	E	T	T	ET	4.3	2475	146	7	0	182	9.3	233	14	5000	-0.181	2130	1990	2010	1820	1580	1550	1490	1510	1330	1420	1350	1330	1360	1360	NA	NA	NA
1274	Aves	Falconiformes	Accipitridae	Aquila	chrysaetos	Golden eagle	56 N	5.5 W	Argyll and Bute, Scotland	UK	No	Whitfield, DP; Fielding, AH; Gregory, MJP; Gordon, AG; McLeod, DRA; Haworth, PH	2007	Ibis, 149:26-36	Herrando-Pérez et al. 2012 - Ecology 93:1728-1740	PGLS + GLMM	Yes	C	f	b	Cfb	7.5	1873	414.5	27	-0.4	95	17	218	31	820	-1.139	14	19	16	15	16	13	18	13	15	15	17	16	17	14	17	16	19
1275	Aves	Strigiformes	Strigidae	Strix	aluco	Tawny owl	52.2 N	2.6 W	Kielder Forest, England	UK	No	Kendeigh, SC	1997	Biology and conservation of owls of the northern hemisphere - 2nd International Symposium. General Technical Report NC-190. St. Paul, MN: US Deptartment of Agriculture, Forest Service, North Central Forest Experiment Station. Duncan, JR.; Johnson, DH; Nicholls, TH (editors)	Herrando-Pérez et al. 2012 - Ecology 93:1728-1740	PGLS + GLMM	Yes	C	f	b	Cfb	8.8	774	457.3	14	0.1	53	19.7	80	16	380	-1.304	41	34	10	43	44	4	48	50	14	51	63	22	27	50	35	29	NA
1276	Aves	Pelecaniformes	Phalacrocoracidae	Phalacrocorax	carbo	Great cormoran	55.8 N	10.1 E	Horsens Fjord, Vorsø	Denmark	No	Bro, E; Deldalle, B; Massot, M; Reitz, FO; Selmi, S	-	T Bregnable, pers. comm.	Herrando-Pérez et al. 2012 - Ecology 93:1728-1740	PGLS + GLMM	Yes	C	f	b	Cfb	7.9	624	610.5	21	-4.4	35	19.9	68	30	900	-0.099	811	869	949	1169	1479	1837	2207	2560	2911	3173	3321	4385	4642	5048	4321	4634	4318
1277	Aves	Gruiformes	Otididae	Otis	tarda	Great bustard	41.1 N	5.6 W	Villafáfila Wildelife Reserve, Zamora	Spain	No	McCullough, DL	2002	Ibis, 144:293-300	Herrando-Pérez et al. 2012 - Ecology 93:1728-1740	PGLS + GLMM	Yes	C	s	b	Csb	11.8	391	614.5	35	-0.3	11	29.1	48	9	900	-0.102	682.8	627.3	650	676.5	766.7	675	728.6	774.1	900	NA	NA	NA	NA	NA	NA	NA	NA
1279	Aves	Charadriiformes	Burhinidae	Burhinus	oedicnemus	Stone curlew	51.1 N	1.7 W	Porton Down, Wiltshire, England	UK	No	Bealey, CE; Green, RE; Robson, R; Taylor, CR; Winspear, R	1999	Bird Study, 46:145-156	Herrando-Pérez et al. 2012 - Ecology 93:1728-1740	PGLS + GLMM	Yes	C	f	b	Cfb	9.7	759	480.9	19	0.2	45	21.6	84	10	420	-0.322	14	10	12	17	19	19	15	11	9	10	NA	NA	NA	NA	NA	NA	NA
1280	Aves	Strigiformes	Strigidae	Strix	nebulosa	Great grey owl	66.8 N	20.4 E	Norrbotten	Sweden	No	Karell, P; Ahola, K; Karstinen, T; Zolei, A; Brommer, JE	2008	Canadian Journal of Zoology, 86:1426-1431	Herrando-Pérez et al. 2012 - Ecology 93:1728-1740	PGLS + GLMM	Yes	D	f	c	Dfc	-1.6	499	992.5	40	-20.1	24	17.8	75	35	680	-1.032	16	36	3	2	37	30	NA	27	65	58	4	45	31	10	86	43	15
1281	Aves	Galliformes	Tetraonidae	Lagopus	muta	Rock Ptarmigan	42.5 N	2.5 E	Canigou Massif, Pyrenees	France	No	Ogutu, JO; Owen-Smith, N	2008	Ibis, 150:270-278	Herrando-Pérez et al. 2012 - Ecology 93:1728-1740	PGLS + GLMM	Yes	C	f	b	Cfb	4.1	1257	530.6	13	-5.1	76	16.9	127	12	350	-0.525	4.11215	3.92523	4.65909	4.39252	3.64486	2.99065	3.83178	3.64486	3.5514	2.28873	3.17757	2.42991	NA	NA	NA	NA	NA
1283	Aves	Phoenicopteriformes	Phoenicopteridae	Phoenicopterus	roseus	Greater flamingo	43.4 N	4.8 E	Fangassier Lagoon, Camargue	France	No	Fryxell, JM, Falls, JB, Falls, AE, Brooks, RJ	2008	Ibis, 150:69-79	Herrando-Pérez et al. 2012 - Ecology 93:1728-1740	PGLS + GLMM	No	C	s	a	Csa	14.2	618	586.2	36	2.1	16	28.7	91	63	1350	-0.304	3000	3000	NA	3000	3000	2400	3400	3000	3500	3500	4000	2500	3645	8000	2500	4000	3300
1284	Aves	Falconiformes	Accipitridae	Accipiter	gentilis	Northern goshawk	52.1 N	8.4 E	Eastern Westphalia	Germany	26	Kruger, O	2007	Oecologia, 152:459-471	Herrando-Pérez et al. 2012 - Ecology 93:1728-1740	PGLS + GLMM	Yes	C	f	b	Cfb	8.8	846	576.4	14	-1.5	58	21.5	90	35	550	-0.432	4.4	5.2	7.2	4.8	4.4	3.6	2.8	2.4	2.8	3.2	2.4	2.8	4.4	3.6	5.2	4.8	4
1285	Aves	Falconiformes	Accipitridae	Buteo	buteo	Common buzzard	52.1 N	8.4 E	Eastern Westphalia	Germany	26	Kruger, O	2001	Oikos, 93:260-273	Herrando-Pérez et al. 2012 - Ecology 93:1728-1740	PGLS + GLMM	Yes	C	f	b	Cfb	8.8	846	576.4	14	-1.5	58	21.5	90	35	540	-0.132	14.6667	12.3333	14.3333	16.3333	13.3333	14.3333	11.6667	18.6667	15.3333	25.3333	22	21	28.3333	26	33.6667	33.3333	40.3333
1286	Aves	Falconiformes	Accipitridae	Hieraaetus	pennata	Booted eagle	38 N	1.45 W	Sierras de Burete, Lavia & Cambrón, Murcia	Spain	No	Martínez, JE; Pagán, I; Calvo, JF	2006	Journal of Ornithology, 147:612-617	Herrando-Pérez et al. 2012 - Ecology 93:1728-1740	GLMM	Yes	B	s	k	Bsk	16.6	329	579.2	44	3.6	4	32.2	47	12	490	-0.785	29	26	21	23	26	22	25	21	21	22	21	21	NA	NA	NA	NA	NA
1287	Aves	Strigiformes	Strigidae	Strix	aluco	Tawny owl	60.3 N	24.3 E	Lahti	Findland	21	Sauer, J R, J E Hines, J E Fallon, K L Pardieck, D J Ziolkowski, Jr, and W A Link	2009	Journal of Animal Ecology, 78:1050-1062	Herrando-Pérez et al. 2012 - Ecology 93:1728-1740	GLMM	Yes	D	f	b	Dfb	4.7	633	808.4	32	-9.6	30	21	79	15	380	-1.094	9	28	33	18	27	32	6	16	27	15	25	32	19	31	33	NA	NA
1289	Mammalia	Eulipotyphla	Soricidae	Blarina	brevicauda	Northern short-tailed shrew	40.2 N	79.3 W	Applachian Plateau, Pennsylvania	USA	No	Lima, M; Merritt, JF; Bozinovic, F	2002	Journal of Animal Ecology, 71:159-172	Herrando-Pérez et al. 2012 - Ecology 93:1728-1740	PGLS + GLMM	Yes	C	f	b	Cfb	9.2	1096	865.7	14	-8.9	71	27.6	112	21	120	-1.479	11.7	7.3	7.9	10.5	8.1	10.7	9.3	8.4	10.6	12.8	6	10.2	5.4	7.6	13.8	8.1	13.3
1290	Mammalia	Didelphimorphia	Didelphidae	Thylamys	elegans	Mouse opossum	31.1 S	71.1 W	Reserva Nacional Las Chinchillas	Chile	22	Prince, PA; Rothery, P; Croxall, JP; Wood, AG	2001	Proceedings of the Royal Society B-Biological Sciences, 268:2053-2064	Herrando-Pérez et al. 2012 - Ecology 93:1728-1740	PGLS + GLMM	Yes	B	s	k	Bsk	11.9	187	301.2	113	2.3	0	22.5	46	15	263	-1.079	8	1	3	4	12	8	2	1	3	1	15	3	2	1	4	NA	NA
1291	Mammalia	Rodentia	Cricetidae	Phyllotis	darwini	Darwin's leaf-eared mouse	31.1 S	71.1 W	Reserva Nacional Las Chinchillas	Chile	22	Philips Price, M	2003	Proceedings of the Royal Society B-Biological Sciences, 270:1997-2007	Herrando-Pérez et al. 2012 - Ecology 93:1728-1740	PGLS + GLMM	Yes	B	s	k	Bsk	11.9	187	301.2	113	2.3	0	22.5	46	15	135	-0.719	91	30	20	15	60	30	25	7.5	2	6	45	3	6	9	18	NA	NA
1292	Aves	Passeriformes	Motacillidae	Anthus	trivialis	Tree Pipit	52.5 N	0.7 W	Thetford Forest, Norfolk/Sufolk, England	UK	27	Burton, NHK	2009	Ibis, 151:361-372	Herrando-Pérez et al. 2012 - Ecology 93:1728-1740	GLMM	No	C	f	b	Cfb	9.4	603	487.7	11	-0.5	36	20.6	58	9	150	-0.725	0.378796	0.437362	0.357983	0.21134	0.279404	0.262147	0.210597	0.153262	0.339823	NA	NA	NA	NA	NA	NA	NA	NA
1293	Aves	Falconiformes	Accipitridae	Circus	pygargus	Montagu's Harrier	46.0 N	0.9 W	Rocherort, Deux-Sèvres	France	No	Sæther, B-E, Tufto, J; Engen, S; Jerstad, K; Røstad, OW; Skåtan, JE	2008	Oikos, 117:1500-1510	Herrando-Pérez et al. 2012 - Ecology 93:1728-1740	GLMM	Yes	C	f	b	Cfb	12.6	799	507.6	24	2.7	43	24.3	99	19	450	-1.069	22.6316	16.8421	11.5789	26.8421	7.36842	15.7895	24.2105	3.68421	15.2632	26.3158	7.36842	11.5789	10.5263	6.31579	6.84211	8.42105	3.68421
1294	Aves	Passeriformes	Tyrannidae	Tyrannus	tyrannus	Eastern kingbird	42.8 N	74.9 W	Upland population, Charlotte Valley, Delaware County, New York	USA	No	Kendeigh, SC	2001	Ecology, 82:1304-1318	Herrando-Pérez et al. 2012 - Ecology 93:1728-1740	PGLS + GLMM	Yes	D	f	b	Dfb	6.7	1065	935.1	14	-12.1	62	26	105	10	230	-0.721	23	24	24	28	16	19	18	20	16	18	NA	NA	NA	NA	NA	NA	NA
1295	Aves	Charadriiformes	Laridae	Rissa	tridactyla	Black-legged kittiwake	59.9 N	1.3 W	Sumburgh Head, Shetland Islands	UK	No	Wesolowski, T & Tomialojc, L	-	M Heubeck, pers. comm.	Herrando-Pérez et al. 2012 - Ecology 93:1728-1740	GLMM	Yes	C	f	b	Cfb	7.1	1137	315.7	30	1.1	56	14.4	135	24	390	-0.225	235	362	305	218	158	178	156	125	132	145	431	450	420	385	328	268	124
1296	Aves	Charadriiformes	Charadriidae	Vanellus	vanellus	Northern lapwing	60 N	16.3 E	Västerfärnebo	Sweden	No	Angulo, E; Roemer, GW; Berec, L; Gascoigne, J; Courchamp, F	2002	Ibis, 144:E131-E140	Herrando-Pérez et al. 2012 - Ecology 93:1728-1740	PGLS + GLMM	Yes	D	f	c	Dfc	5.3	618	765.7	29	-8.6	31	21.6	78	10	300	-0.914	217.337	151.019	203.645	296.162	235.538	182.756	188.372	194.706	150.465	207.368	NA	NA	NA	NA	NA	NA	NA
1297	Aves	Anseriformes	Anatidae	Bucephala	islandica	Barrow's goldeneye	65.6 N	17.0 W	Myvatn Lake	Iceland	16	Gardarsson, A; Einarsson, A; Gislason, GM; Gudbergsson, G	2006	Hydrobiologia, 567:183-194	Herrando-Pérez et al. 2012 - Ecology 93:1728-1740	PGLS + GLMM	Yes	E	T	T	ET	1.9	879	408.4	22	-5.7	45	11.5	101	28	480	-0.54	554.366	432.606	374.747	770	857.369	857.601	747.459	608.272	637.55	184.67	411.458	562.727	725.615	638.71	418.195	598.51	680.07
1299	Aves	Anseriformes	Anatidae	Branta	leucopsis	Barnacle goose	57.3 N	18.6 E	Laus Holmar Islands	Sweden	No	Larsson, K; Forslund, P	1994	Journal of Animal Ecology, 63:954-962	Herrando-Pérez et al. 2012 - Ecology 93:1728-1740	PGLS + GLMM	No	C	f	b	Cfb	7.3	532	645.3	25	-3.2	30	20.2	58	13	640	-0.197	65	125	225	325	450	630	830	970	1050	1100	1240	1340	1550	NA	NA	NA	NA
1300	Mammalia	Cetartiodactyla	Cervidae	Odocoileus	hemionus	Black-tailed deer (Mule deer)	47 N	122.2 W	King Creek, Washingon	USA	No	Reading, RP, Mix, H, Lhagvasuren, B & Tseveenmyadag, N	2004	Journal of Wildlife Management, 68:120-128	Herrando-Pérez et al. 2012 - Ecology 93:1728-1740	GLMM	Yes	C	s	b	Csb	9.2	1425	491.5	47	-0.8	35	23.4	201	19	1470	-0.107	0.40158	0.36842	0.35737	0.38579	0.39211	0.31474	0.29263	0.29263	0.28632	0.31158	0.30684	0.29263	0.26895	0.27211	0.24053	0.23105	0.21526
1301	Aves	Falconiformes	Accipitridae	Gyps	fulvus	Griffon vulture	35.25 N	24.8 E	Crete	Crete	No	Drewien, RC; Brown, WM; Kendall, WL	2010	Bird Study, 57:213-225	Herrando-Pérez et al. 2012 - Ecology 93:1728-1740	PGLS + GLMM	Yes	C	s	a	Csa	11.3	767	521	42	2.5	15	22.7	103	10	1000	-0.446	100	102	135	181	176	156	138	147	140	143	NA	NA	NA	NA	NA	NA	NA
1302	Mammalia	Cetartiodactyla	Bovidae	Kobus	ellipsiprymnus	Common waterbuck	24 S	31.5 E	Kruger National Park	South Africa	19	Kendeigh, SC	2006	Ecology Letters, 6:412-419	Herrando-Pérez et al. 2012 - Ecology 93:1728-1740	PGLS + GLMM	Yes	B	s	h	Bsh	22.7	502	360.6	79	8.5	5	33.4	92	20	2650	-0.006	2528.9	2495.45	2578.47	2975.82	3644.75	3772.5	3346.75	3643.25	4356.75	4307.25	3978.75	3690.25	3325.75	3034	2598	2015.78	1539.02
1303	Mammalia	Cetartiodactyla	Bovidae	Aepyceros	melampus	Impala	24 S	31.5 E	Kruger National Park	South Africa	19	Ogutu, JO; Owen-Smith, N	2006	Ecology Letters, 6:412-419	Herrando-Pérez et al. 2012 - Ecology 93:1728-1740	PGLS + GLMM	Yes	B	s	h	Bsh	22.7	502	360.6	79	8.5	5	33.4	92	20	2050	-0.041	147956	141586	145717	163196	179013	174523	169563	189802	203021	194692	184497	180482	179078	174454	165763	154616	143238
1304	Mammalia	Perissodactyla	Equidae	Equus	burchelli	Plains Zebra	24 S	31.5 E	Kruger National Park	South Africa	19	Enemar, A, Nilsson, L & Sjostrand, B	2006	Ecology Letters, 6:412-419	Herrando-Pérez et al. 2012 - Ecology 93:1728-1740	PGLS + GLMM	Yes	B	s	h	Bsh	22.7	502	360.6	79	8.5	5	33.4	92	20	3150	-0.176	17352.7	18710.4	20055	21729	24381	26547	27585.2	29059	30716.2	32060.5	31960	31086.8	31345	32030.2	32088.2	30969	30082.3
1309	Mammalia	Cetartiodactyla	Giraffidae	Giraffa	camelopardalis	Giraffe	24 S	31.5 E	Kruger National Park	South Africa	19	Susan L. Earnst, Robert A. Stehn, Robert M. Platte, William W. Larned, and Edward J. Mallek	2006	Ecology Letters, 6:412-419	Herrando-Pérez et al. 2012 - Ecology 93:1728-1740	PGLS + GLMM	Yes	B	s	h	Bsh	22.7	502	360.6	79	8.5	5	33.4	92	20	4800	-0.177	4185.71	4185.6	4231.27	4388.21	4803.75	5008	4990.5	5180.75	5434	5449.75	5178.75	4971	4867.75	4708.75	4597.75	4657.5	4769.31
1311	Aves	Falconiformes	Falconidae	Falco	peregrinus	Peregrine falco	34.7 N	120.1 W	Coastal population, California	USA	No	Alaska Fisheries Science Center	2003	Ecological Applications, 13:1802-1816	Herrando-Pérez et al. 2012 - Ecology 93:1728-1740	PGLS + GLMM	Yes	C	s	b	Csb	15	476	355.4	94	4	0	27.4	97	24	420	-0.107	3	4	5	5	6	7	12	11	12	11	13	14	14	14	17	19	23
1312	Aves	Charadriiformes	Scolopacidae	Calidris	ferruginea	Curlew sandpipper	56.2 N	16.4 E	Ottenby, Oland Island, Baltic Sea	Sweden	No	Sven Blomqvist · Noél Holmgren · Susanne Åkesson	2002	Oecologia, 133:146–158	Herrando-Pérez et al. 2012 - Ecology 93:1728-1740	PGLS + GLMM	Yes	C	f	b	Cfb	7.9	525	658.6	23	-3	30	21.3	61	49	180	-0.884	11	11	135	35	25	29	94	70	1	24	11	23	9	6	33	39	38
1313	Mammalia	Carnivora	Canidae	Vulpes	lagopus	Arctic fox	73.35 N	80.53 E	Taimyr Peninsula, Siberia	Russia	No	Y I Kokorev, V A Kuksov	2002	Ornis Svecica, 12: 139-145 (Novikov 1953)	Herrando-Pérez et al. 2012 - Ecology 93:1728-1740	PGLS + GLMM	Yes	E	T	T	ET	-11.5	347	1192.3	33	-30.4	18	8.3	50	36	873	-1.249	58	5	1	50	25	10	34	15	5	10	81	8	1	53	16	9	79
1314	Aves	Ciconiiformes	Ardeidae	Ardea	purpurea	Purple heron	43.6 N	4.53 E	Langedoc Wetlands,	France	No	Deerengerg, D; Hafner, H	1999	Ardea, 87:217-226	Herrando-Pérez et al. 2012 - Ecology 93:1728-1740	PGLS + GLMM	Yes	C	s	a	Csa	14.1	681	595.3	34	1.8	21	29.2	102	17	840	-0.421	1287.31	1064.04	1882.44	1659.2	1196.34	983.516	1025.84	1260.92	1261.63	965.444	1039.05	774.132	707.114	614.054	562.661	1250.87	1366.14
1315	Aves	Gruiformes	Gruidae	Grus	canadensis	Sandhill crane	34.55 N	106.8 W	Rio Grande Valley, New Mexico	USA	No	Ogutu, JO; Owen-Smith, N	1995	The Journal of Wildlife Management, 59:339-356	Herrando-Pérez et al. 2012 - Ecology 93:1728-1740	PGLS + GLMM	Yes	B	s	k	Bsk	12.7	232	803.4	60	-7.5	10	33.7	46	21	1000	-0.249	1731	1370	2797	2902	2072	3675	4589	3322	4182	4036	3833	5723	4889	6457	5558	8175	8963
1316	Aves	Gaviiformes	Gaviidae	Gavia	adamsii	Yellow-billed loon	70.6 N	155.6 W	National Petroleum Reserve	USA	No	Lindstrom, A; Enemar, A; Andersson, G; von Proschwitz, T; Nyholm, NEI	2005	The Condor, 107:289-304	Herrando-Pérez et al. 2012 - Ecology 93:1728-1740	PGLS + GLMM	Yes	E	T	T	ET	-11.9	138	1308.5	72	-33.1	4	10.7	32	18	840	-0.778	3439.18	1831.01	2341.18	3289.28	2000.65	3067.07	3944.1	2868.49	2680.45	3403.67	4907.96	3287.97	3786.33	2840.89	2487.18	1458.91	2312.27
1317	Mammalia	Lagomorpha	Leporidae	Lepus	americanus	Snow hare	61.02 N	138.4 W	Kluane Lake, Yukon, Alaska	USA	No	Oro, D; Martinez-Abrain, A; Paracuellos, M; Nevado, JC; Genovart, M	2011	Proceedings of the Royal Society B-Biological Sciences, 278:481-489	Herrando-Pérez et al. 2012 - Ecology 93:1728-1740	PGLS + GLMM	Yes	E	T	T	ET	-2.9	387	1126.5	42	-25.2	15	18.2	61	34	450	-0.389	0.02812	0.30937	0.73125	1.95	2.8875	0.75	0.13125	0.15	0.15937	0.1125	0.17812	0.525	0.92813	1.51875	1.02188	0.3	0.09375
1318	Mammalia	Cetartiodactyla	Bovidae	Rupicapra	pyrenaica	Pyrenean chamois	42.57 N	0.94 E	Aigüestortes & Estany de Sant Maurici National Park, Lleida	Spain	No	Coulson, JC; Thomas, CS	2010	Hystrix Italian Journal of Mammalogy, 21:183-188	Herrando-Pérez et al. 2012 - Ecology 93:1728-1740	PGLS + GLMM	Yes	C	f	b	Cfb	2.6	1338	537.2	12	-7.2	89	15.3	141	17	1340	-0.32	752.795	920.497	1009.94	1043.48	937.267	970.807	1060.25	1049.07	1222.36	1121.74	954.037	914.907	624.224	736.025	702.485	797.515	775.155
1320	Mammalia	Carnivora	Canidae	Vulpes	vulpes	European red fox	41.2 N	5.05 W	Aragón	Spain	No	Kendeigh, SC	2009	European Journal Wildlife Research, 55:161-165	Herrando-Pérez et al. 2012 - Ecology 93:1728-1740	GLMM	Yes	C	s	b	Csb	12.2	375	611.9	30	0	12	29.4	46	15	962	-0.725	11.4089	10.4631	13.6552	11.2118	10.266	9.3202	11.6847	12.4335	11.2906	9.67488	9.20197	9.3202	10.1478	11.33	10.0296	NA	NA
1321	Aves	Passeriformes	Laniidae	Lanius	collurio	Red-backed shrike	51.85 N	16.88 E	Lezno	Poland	No	Novoa, C; Besnard, A; Brenot, JF; Ellison, LN	2001	International Journal Biometeorology, 245:217-219	Herrando-Pérez et al. 2012 - Ecology 93:1728-1740	PGLS + GLMM	Yes	C	f	b	Cfb	8.2	536	741.6	35	-6	25	23.5	76	18	170	-0.795	3.80774	31.9072	40.8412	42.9688	28.9979	31.7895	35.9096	33.7219	25.892	37.9787	36.7884	44.5598	49.6764	56.95	53.6006	53.7373	57.5261
1322	Aves	Passeriformes	Alaudidae	Lullula	arborea	Woodlark	52.5 N	0.67 W	Thetford Forest, Norfolk/Sufolk, England	UK	27	Reading, RP, Mix, H, Lhagvasuren, B & Tseveenmyadag, N	2009	Journal of Animal Ecology, 78:1191-1202	Herrando-Pérez et al. 2012 - Ecology 93:1728-1740	PGLS + GLMM	Yes	C	f	b	Cfb	9.4	616	498.8	9	-0.3	39	21.4	59	31	150	-0.049	0.02	0.01908	0.02185	0.03062	0.03108	0.02831	0.06292	0.05692	0.04169	0.044	0.04077	0.03754	0.03662	0.04585	0.03108	0.03062	0.02738
1323	Aves	Charadriiformes	Charadriidae	Pluvialis	apricaria	Eurasian golden plover	53.4 N	1.87 W	Snake Summit (SK 0891) and Mill Hill, Peak District, England	UK	No	Lima, M; Stenseth, NC; Leirs, H; Jaksic, FM	1997	Bird Study, 44:227-234	Herrando-Pérez et al. 2012 - Ecology 93:1728-1740	PGLS + GLMM	Yes	C	f	b	Cfb	7.1	1265	469.7	19	-1.5	80	18.3	144	24	280	-0.546	12.0482	23.9759	28.012	27.0482	27.1084	12.9518	6.14458	8.19277	26.0843	5.36145	9.09639	11.0843	16.988	11.9879	9.21687	15.7229	21.0241
1324	Mammalia	Rodentia	Cricetidae	Akodon	azarae	Azara's Grass Mouse	33.03 S	64.2 W	Chucul, Córdoba, Argentina	Argentina	No	V. Andreo, C. Provensal, M. Scavuzzo, M. Lamfri, J. Polop	2009	Austral Ecology, 34:132-142	Herrando-Pérez et al. 2012 - Ecology 93:1728-1740	PGLS + GLMM	Yes	C	f	a	Cfa	16.9	819	472	63	4	14	30.1	135	15	24	-0.605	29	41	20	19	18	26	7	10	27	29	37	28	38	30	25	NA	NA
[truncated: 124 more columns]
